# Supplementary material for: Gold(i)-catalyzed addition of carboxylic acids to internal alkynes in aqueous medium
Source: Royal Society of Chemistry journal article supplement (doi:10.1039/c6ob02800d), 2017-01-01

*Organic & Biomolecular Chemistry*

**Electronic Supporting Information**

**Gold(I)-catalyzed addition of carboxylic acids to internal alkynes in  
aqueous medium**

**Pedro J. González-Liste, Sergio E. García-Garrido\* and Victorio Cadierno\***

*Laboratorio de Compuestos Organometálicos y Catálisis (Unidad Asociada al CSIC),  
Centro de Innovación en Química Avanzada (ORFEO-CINQA), Departamento de  
Química Orgánica e Inorgánica, IUQOEM, Universidad de Oviedo, Julián Clavería 8,  
E-33006 Oviedo, Spain. E-mail: garciagsergio@uniovi.es (S.E.G.-G.), vcm@uniovi.es  
(V.C.); Fax: +(34) 985103443; Tel.: +(34) 985103453.*

**Contents:**

- Copies of the NMR spectra of enol esters **3aa-3aq**. S2-S19
- Copies of the NMR spectra of enol esters **3ba-3jh**. S19-S28
- Copies of the NMR spectra of enol esters **4ka-4ua** and **5ka-5ua**. S28-S39

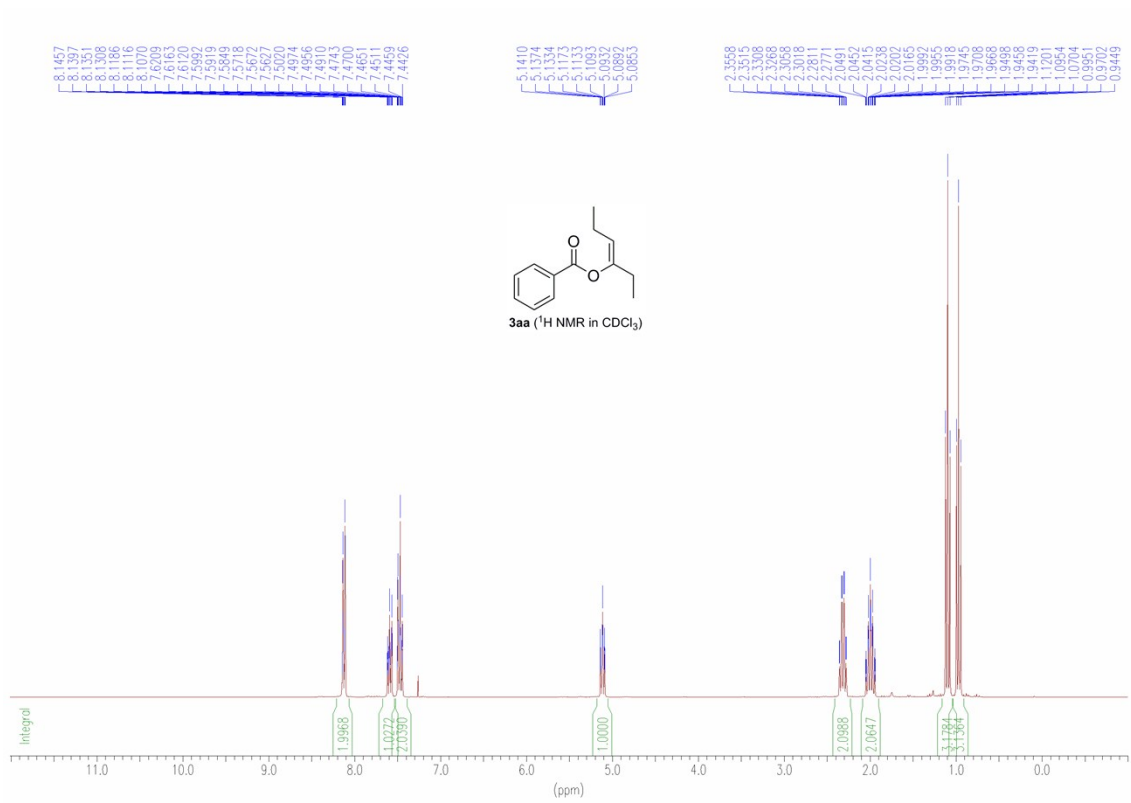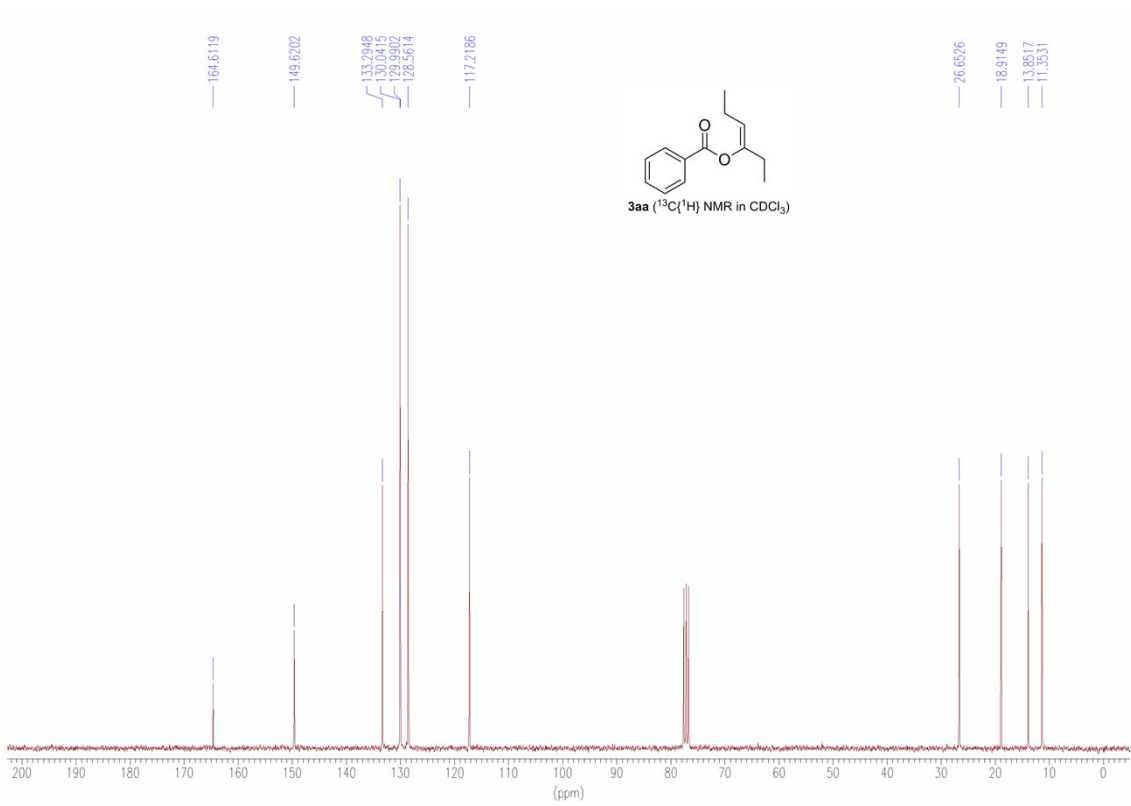

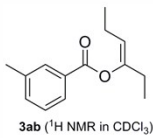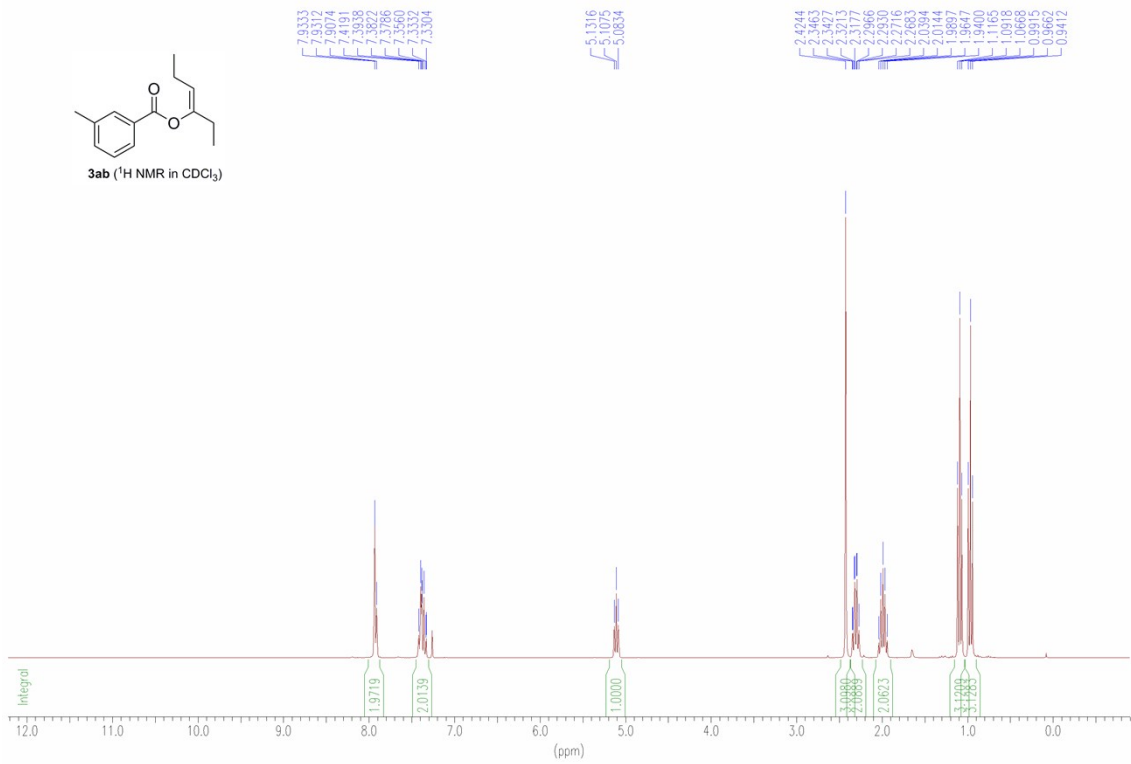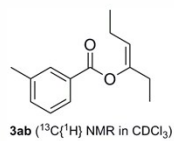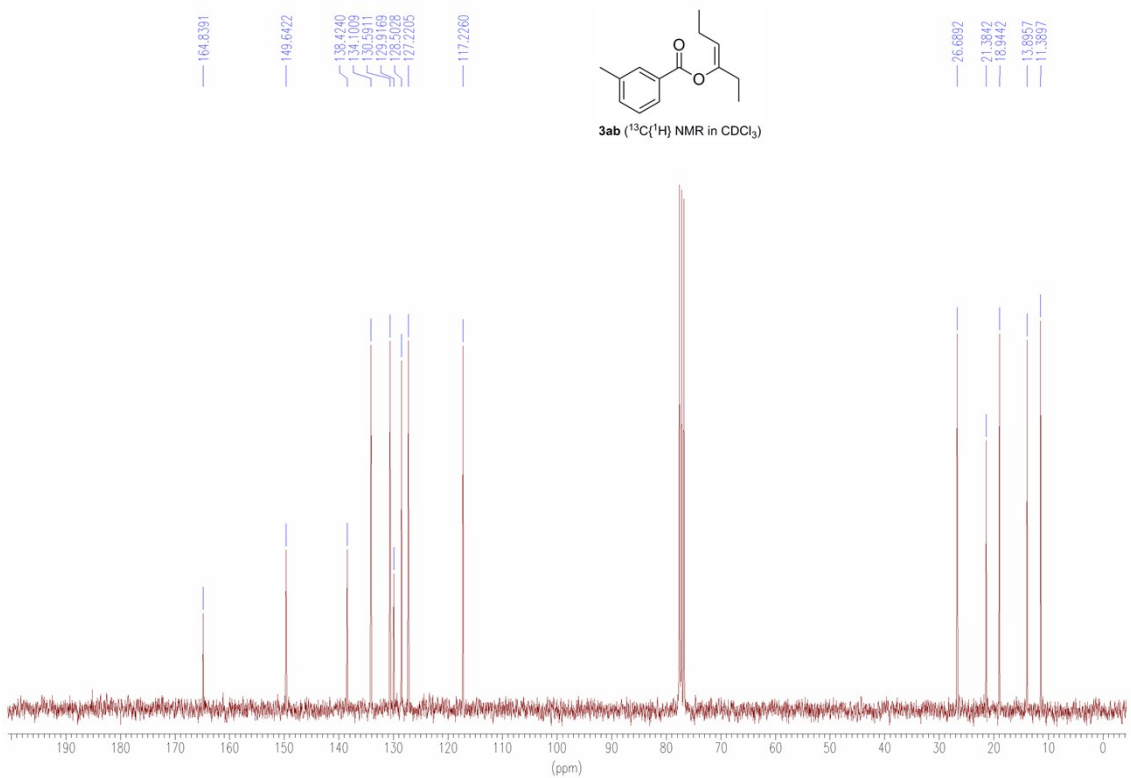

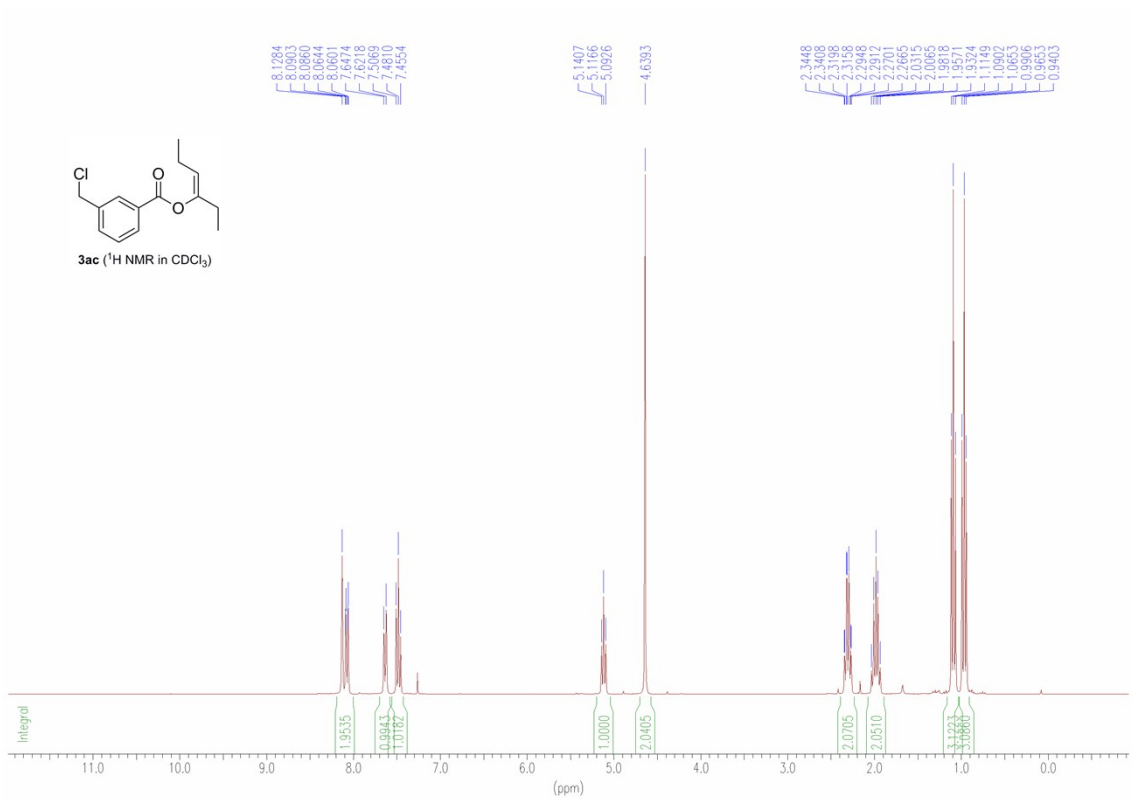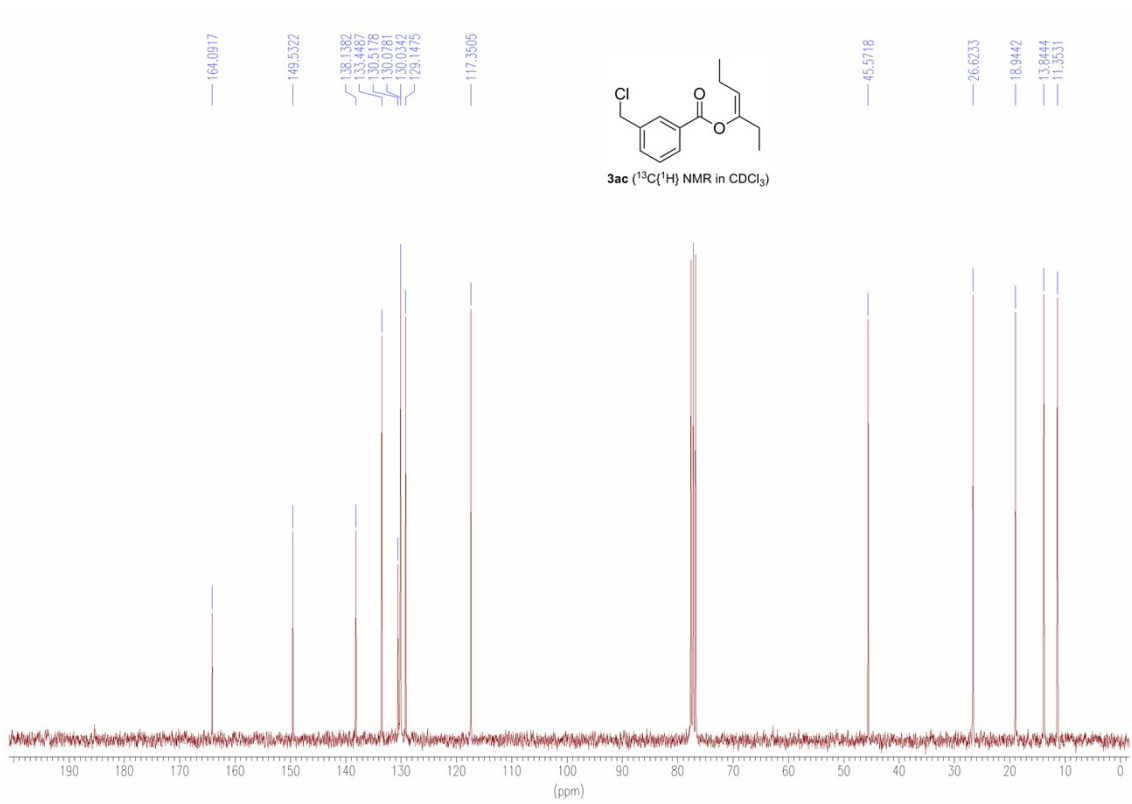

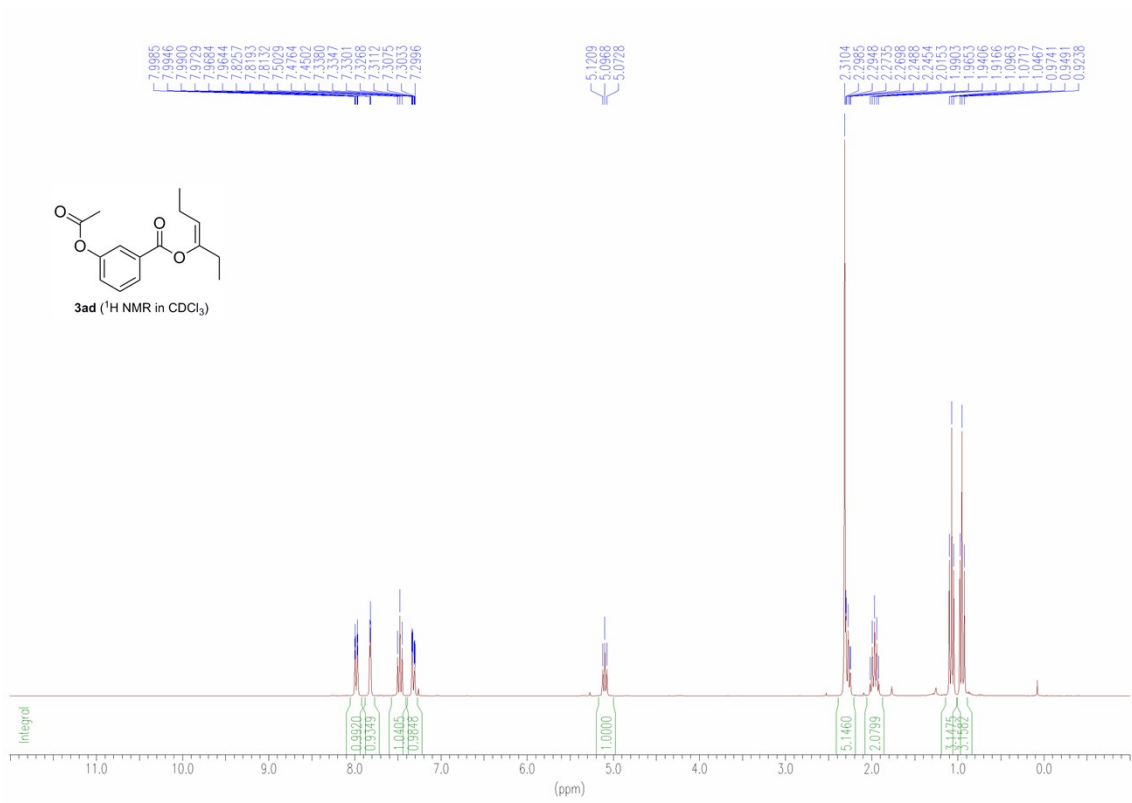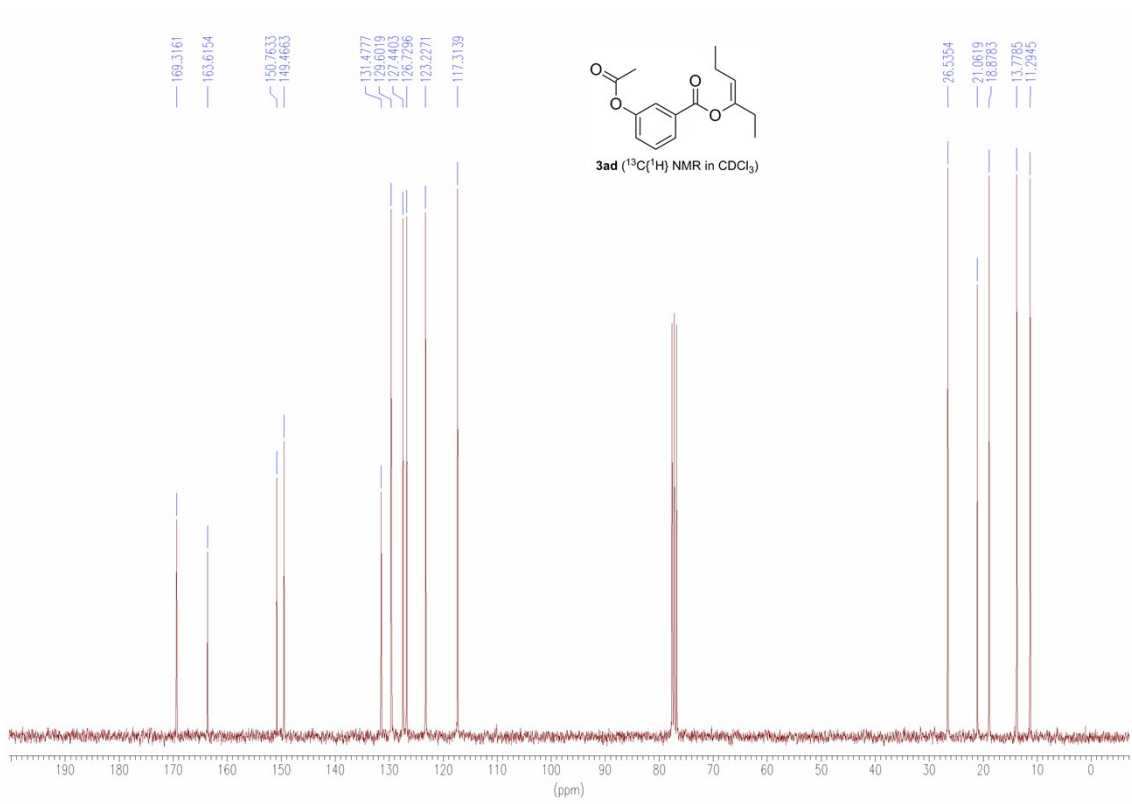

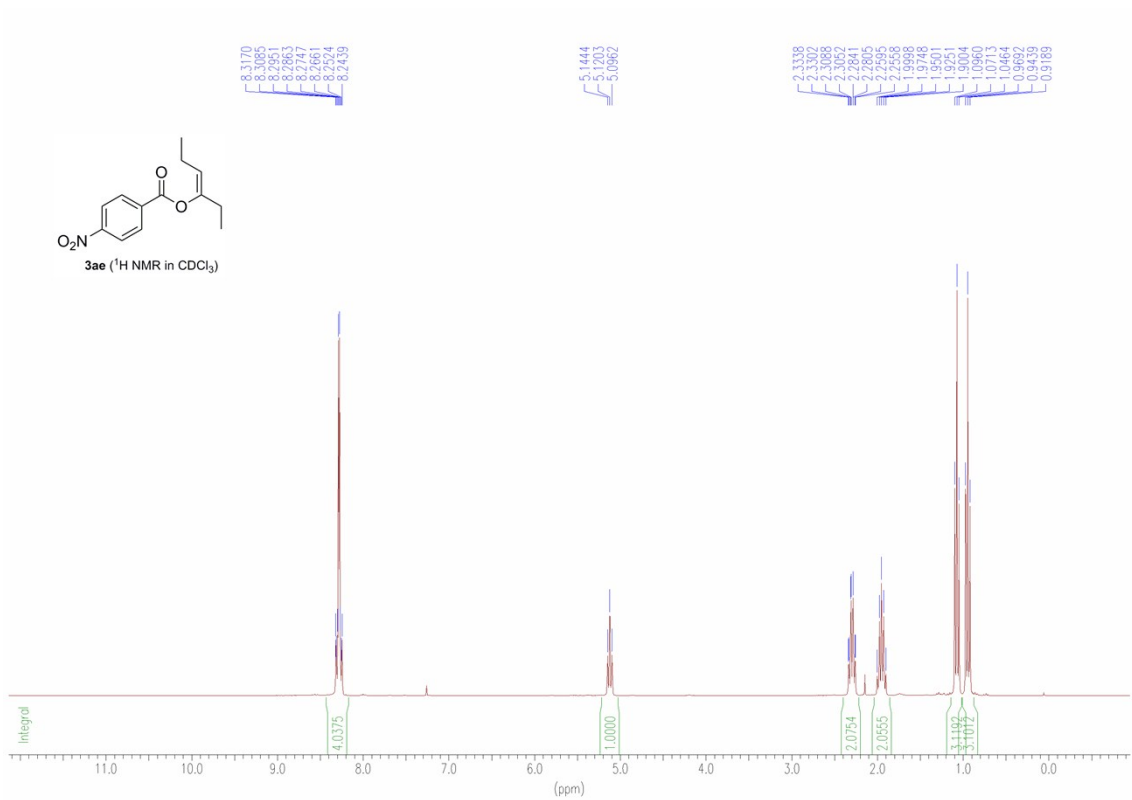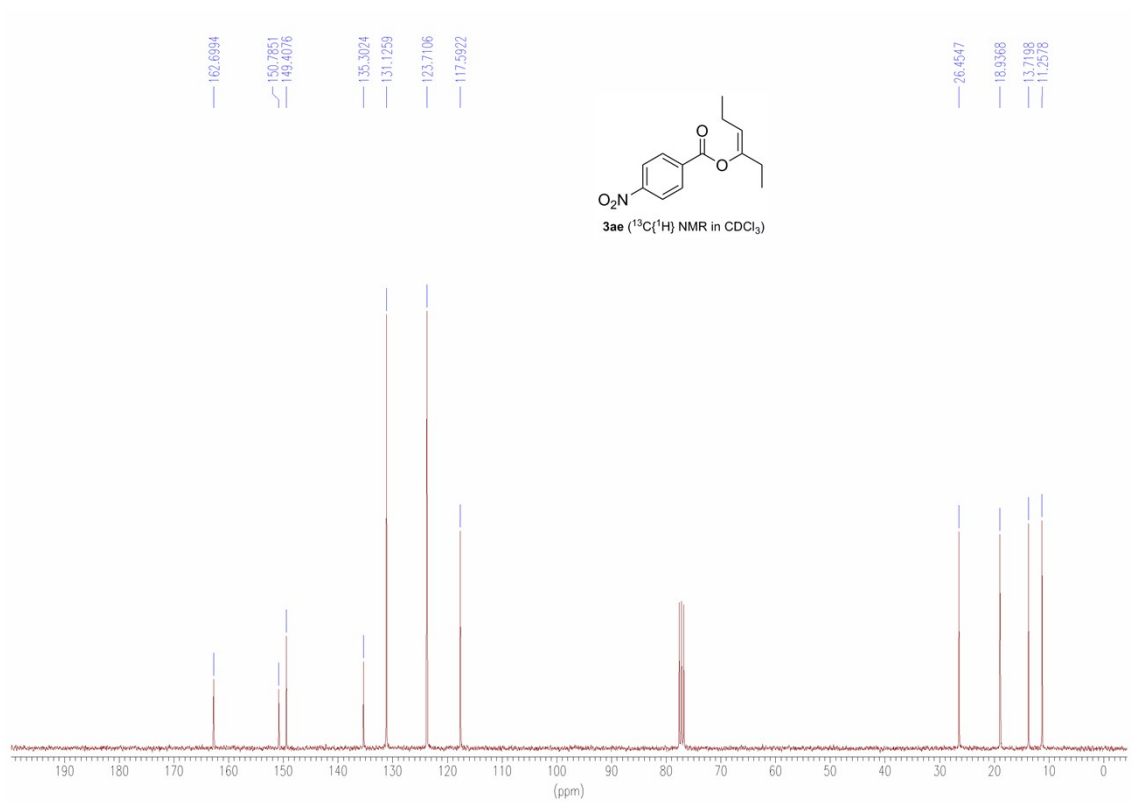

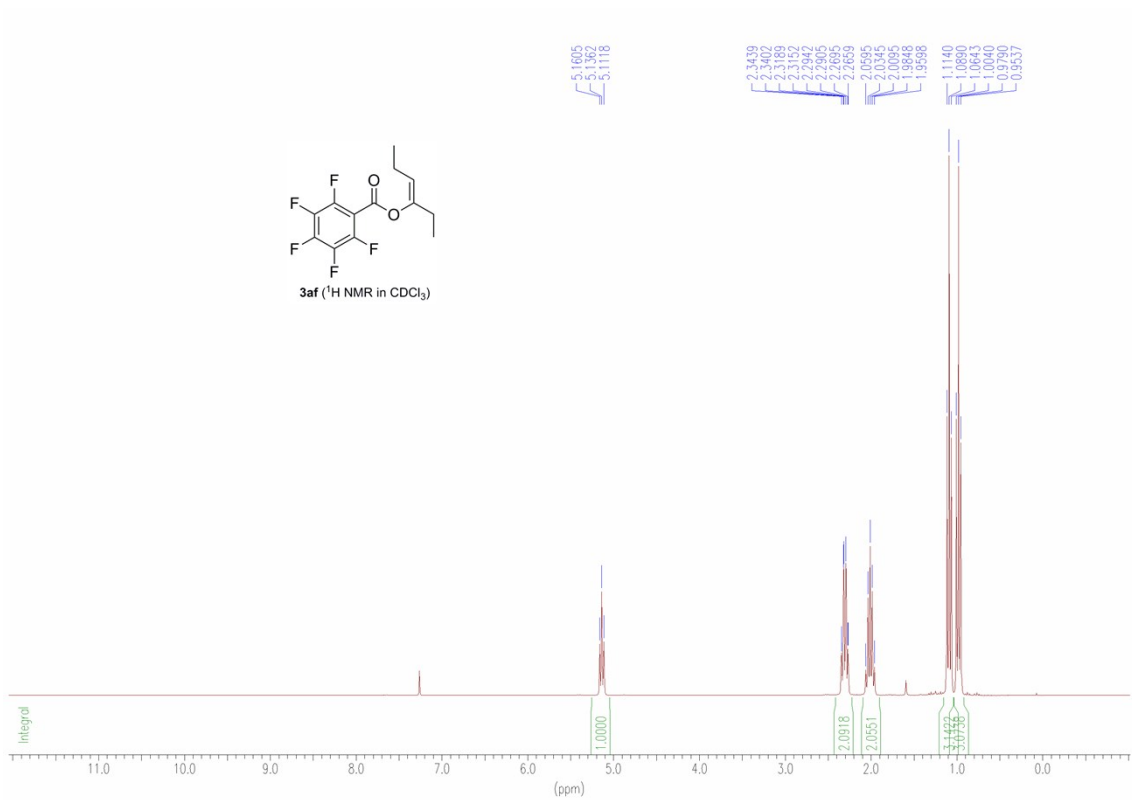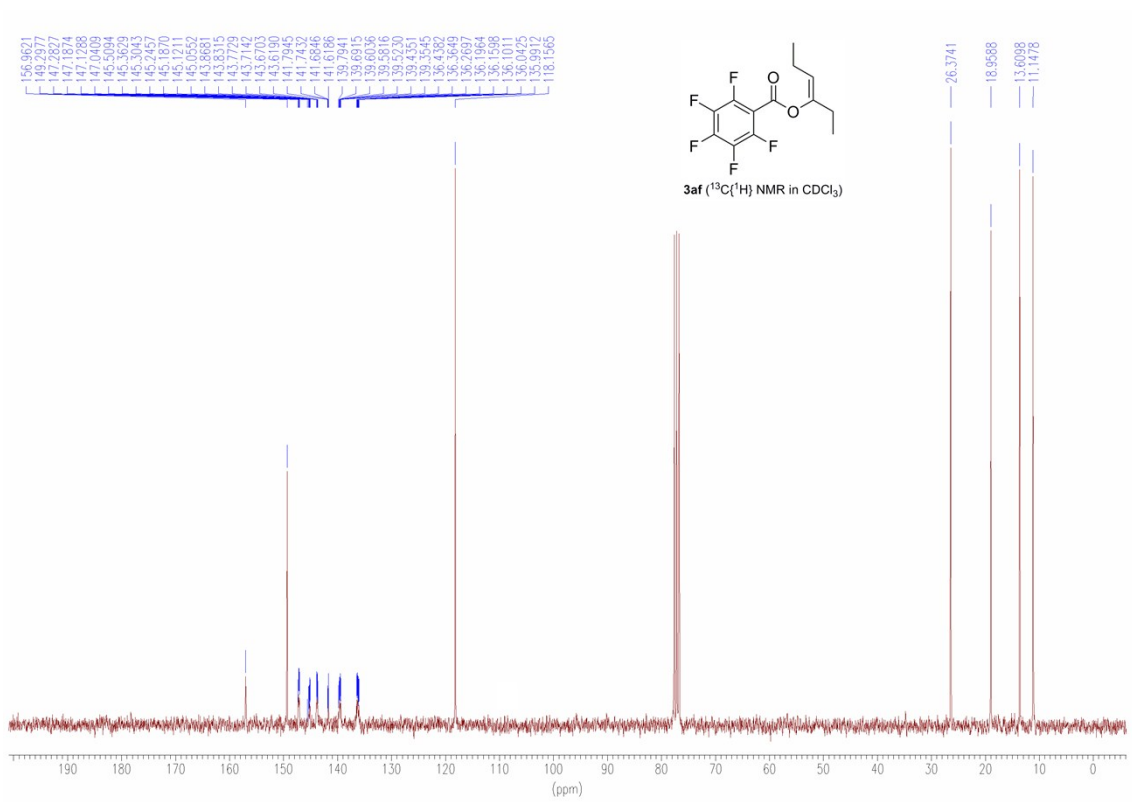

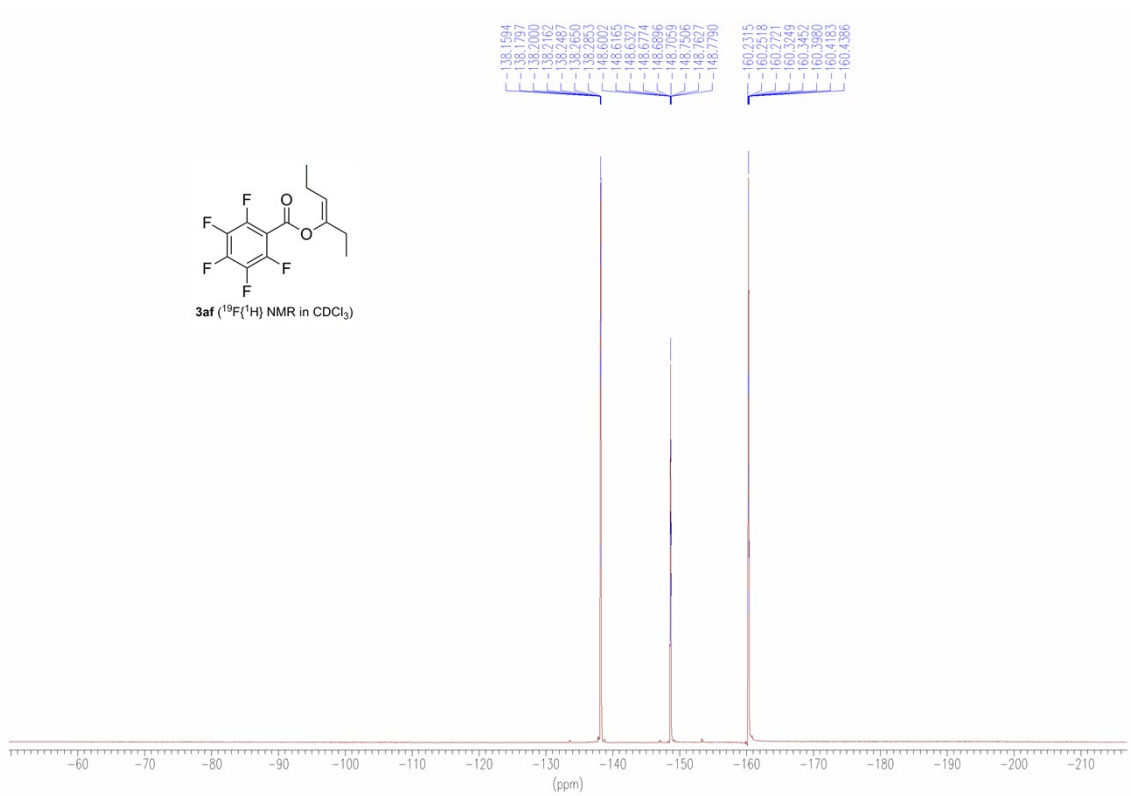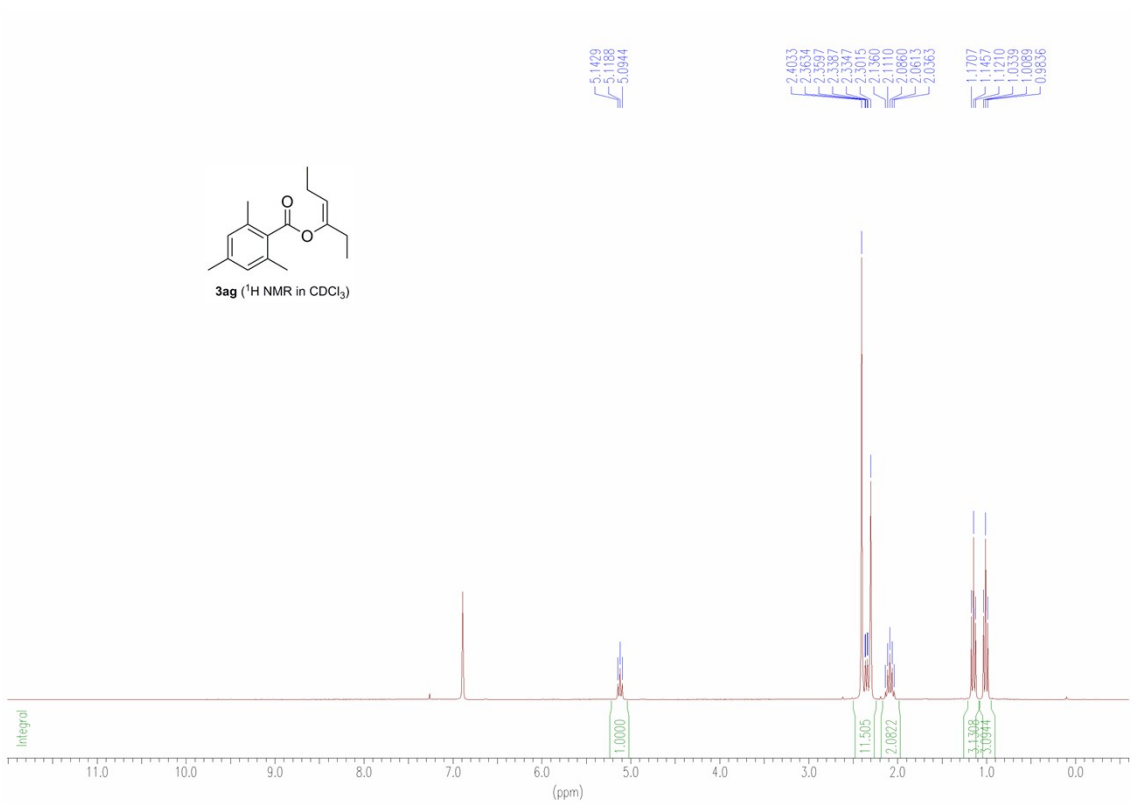



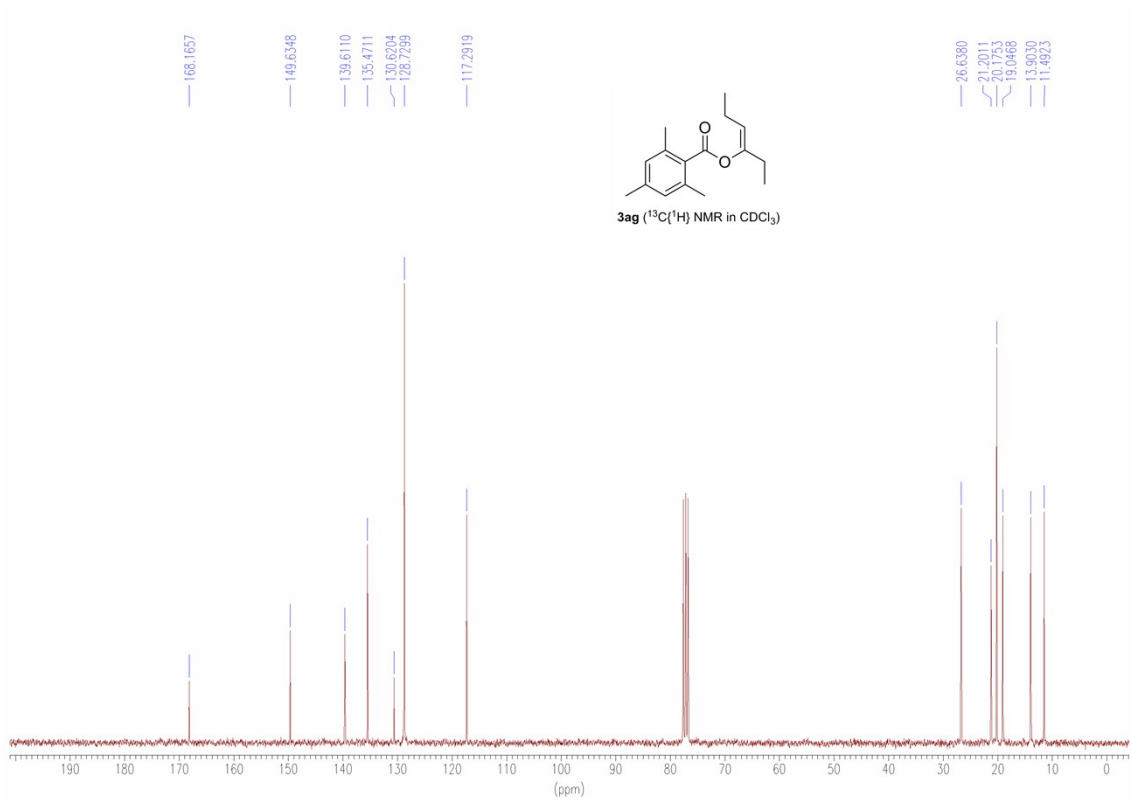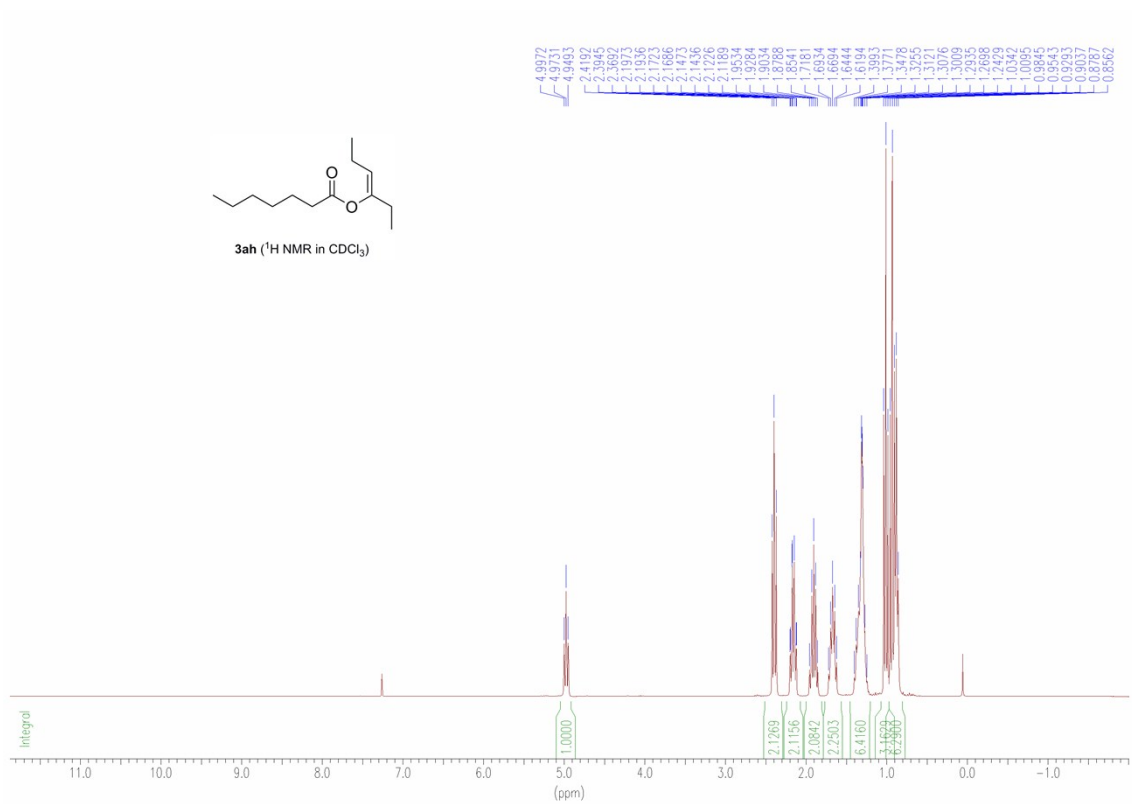

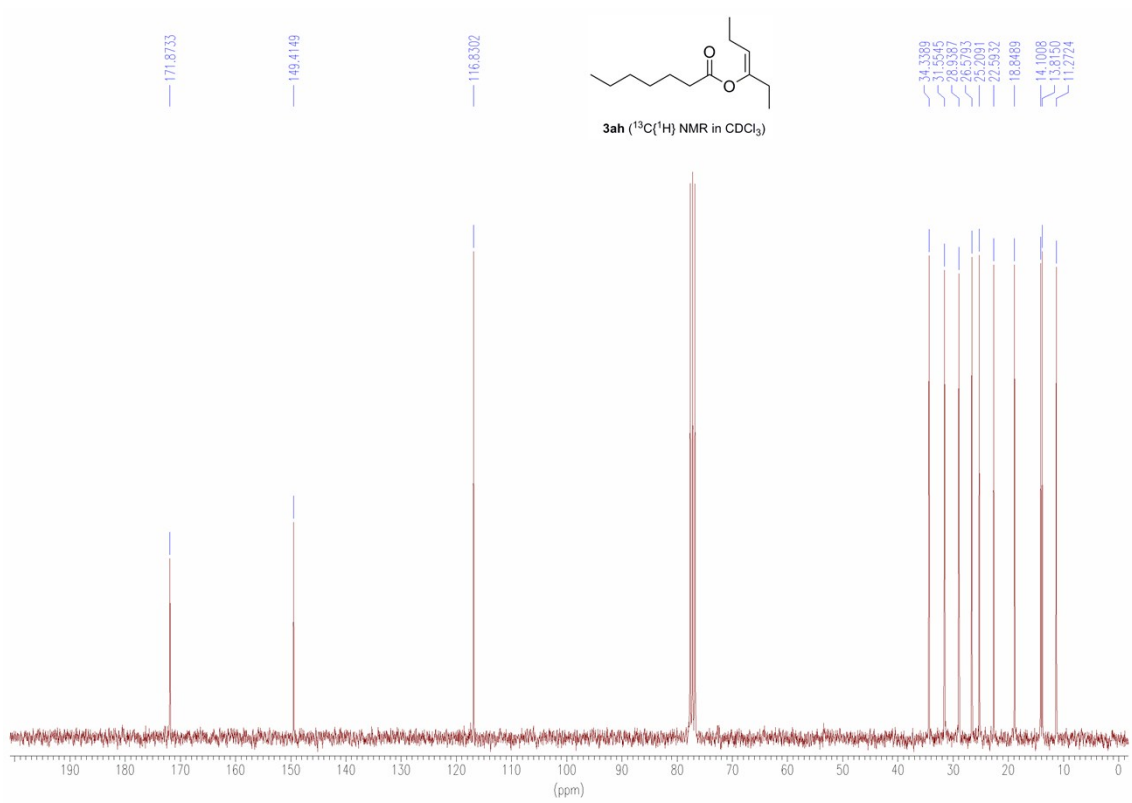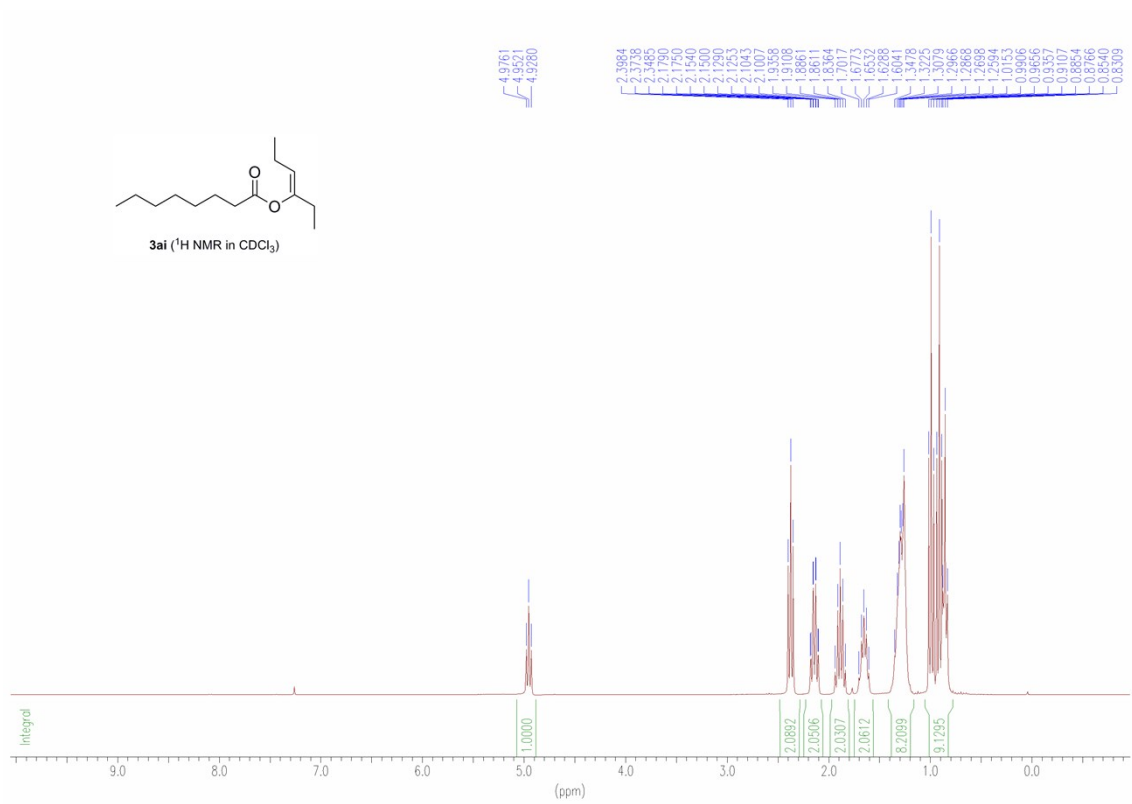

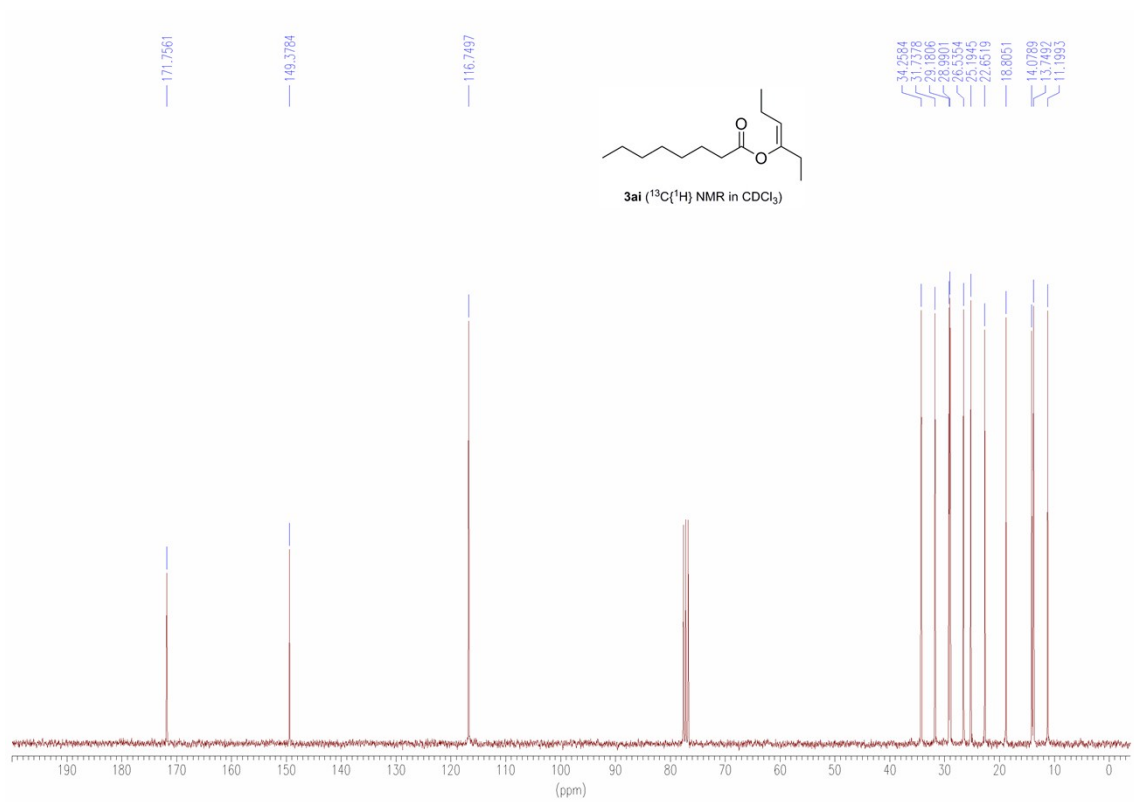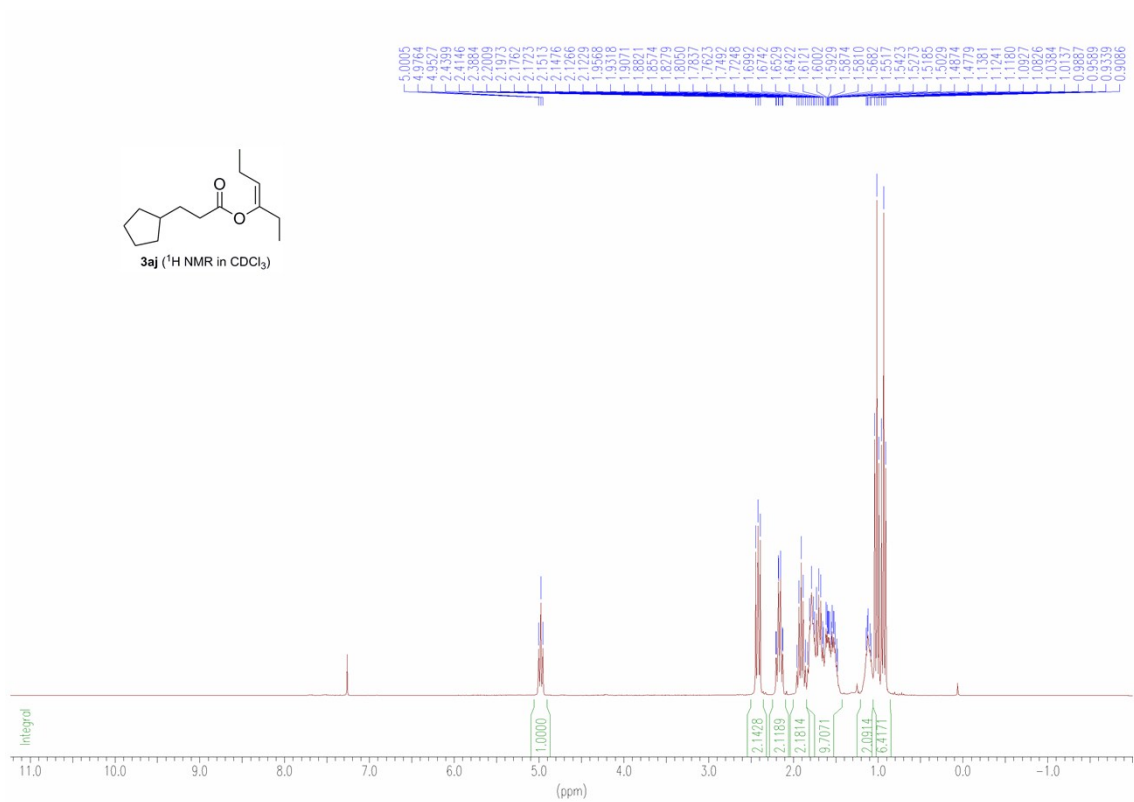

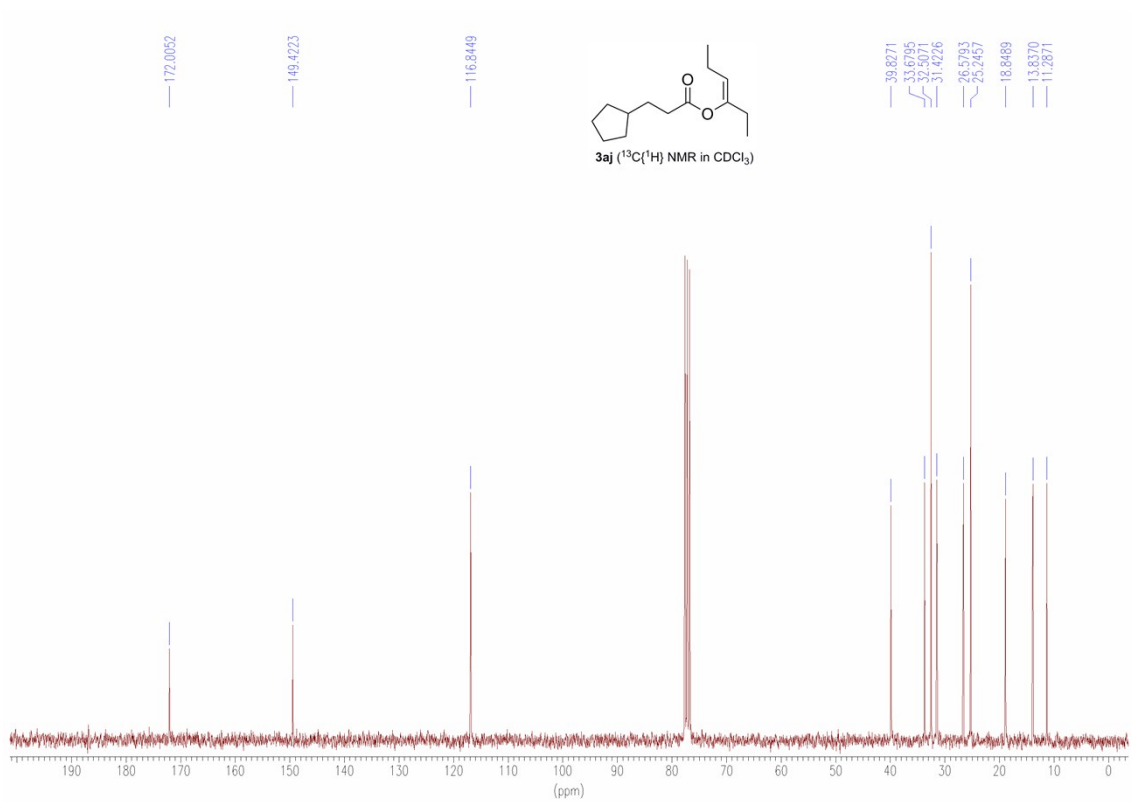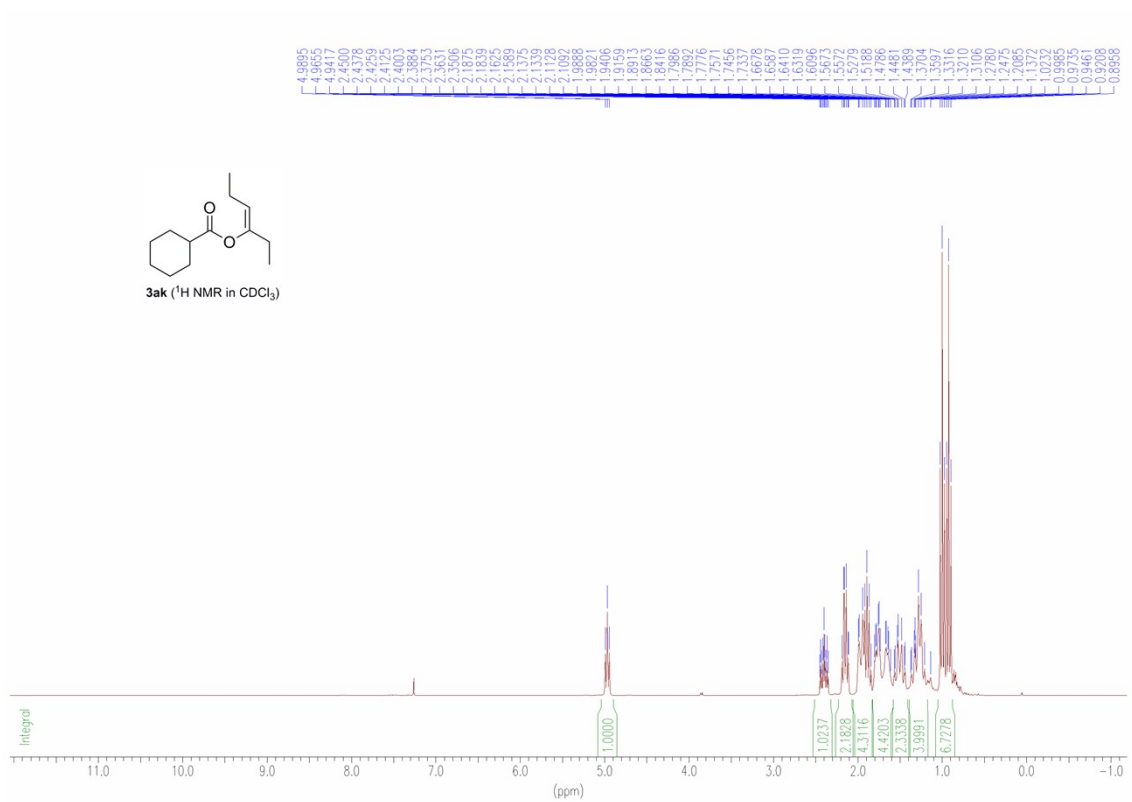

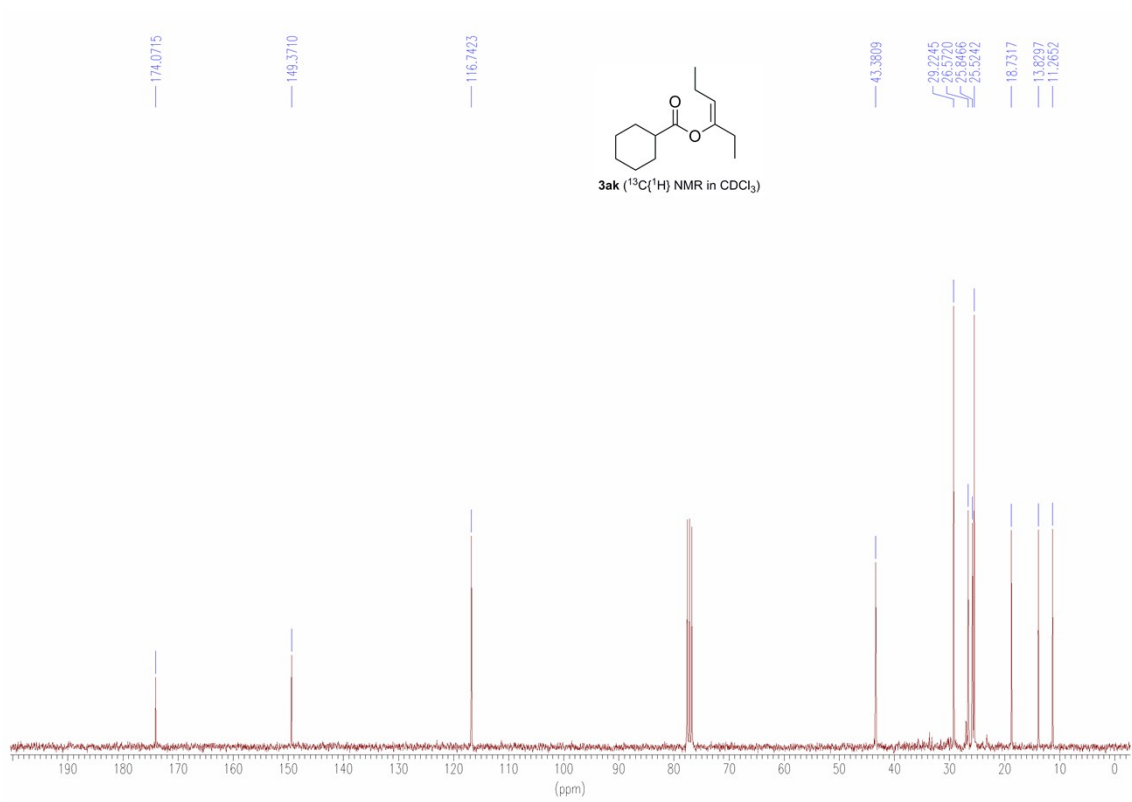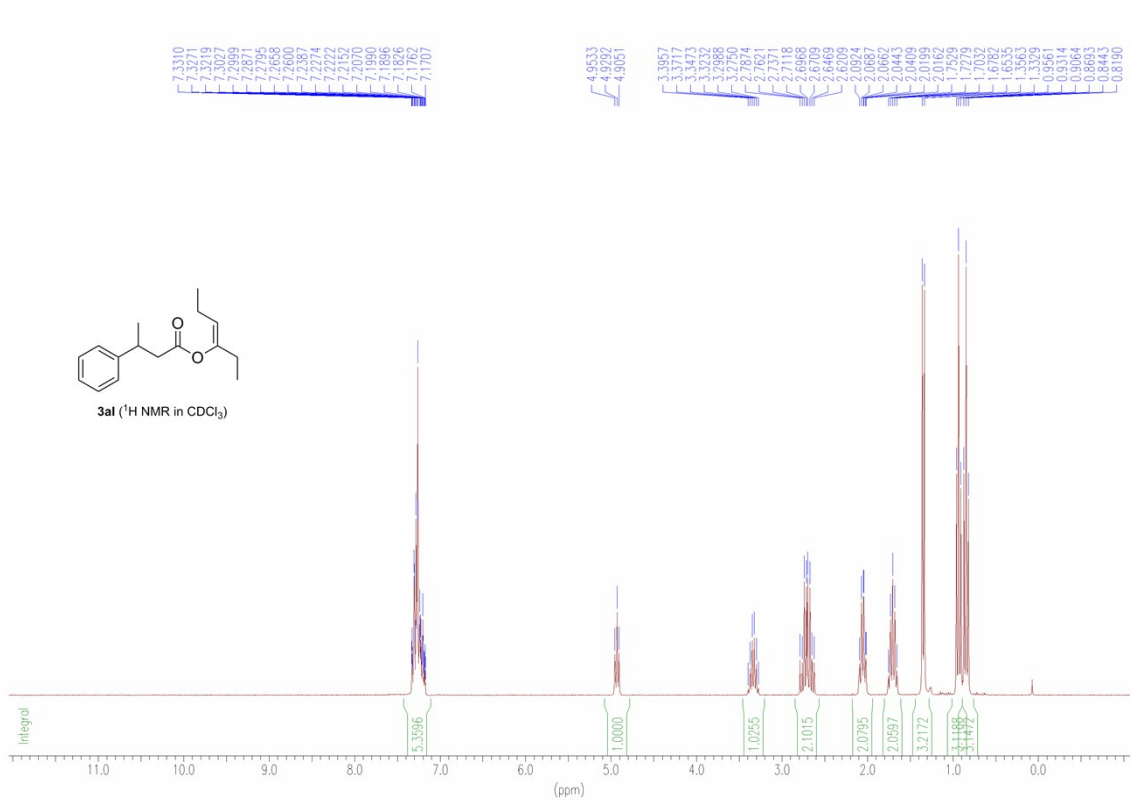

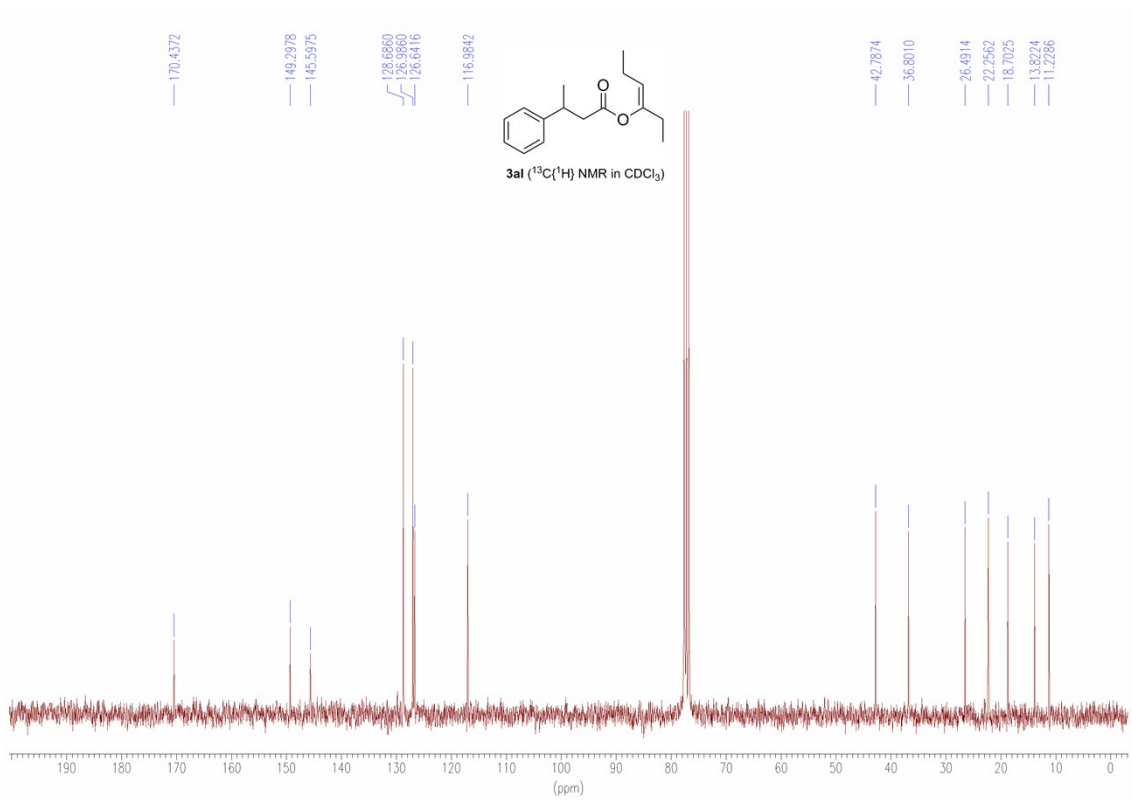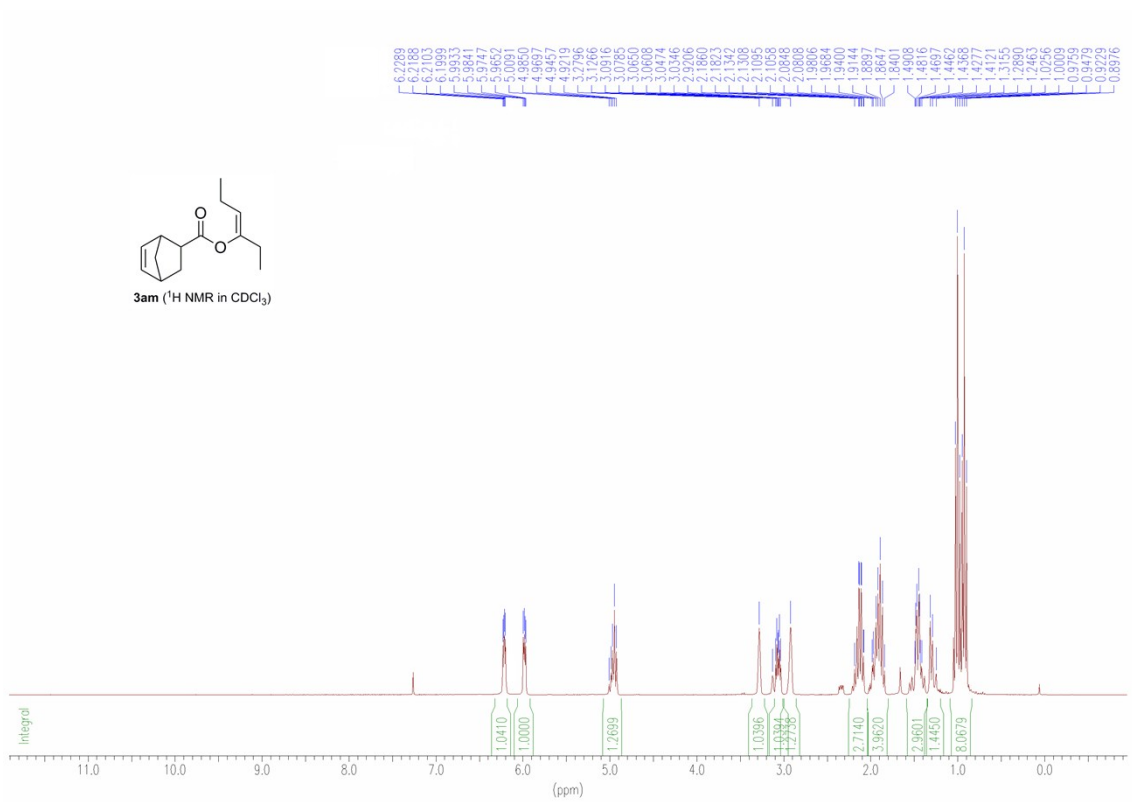



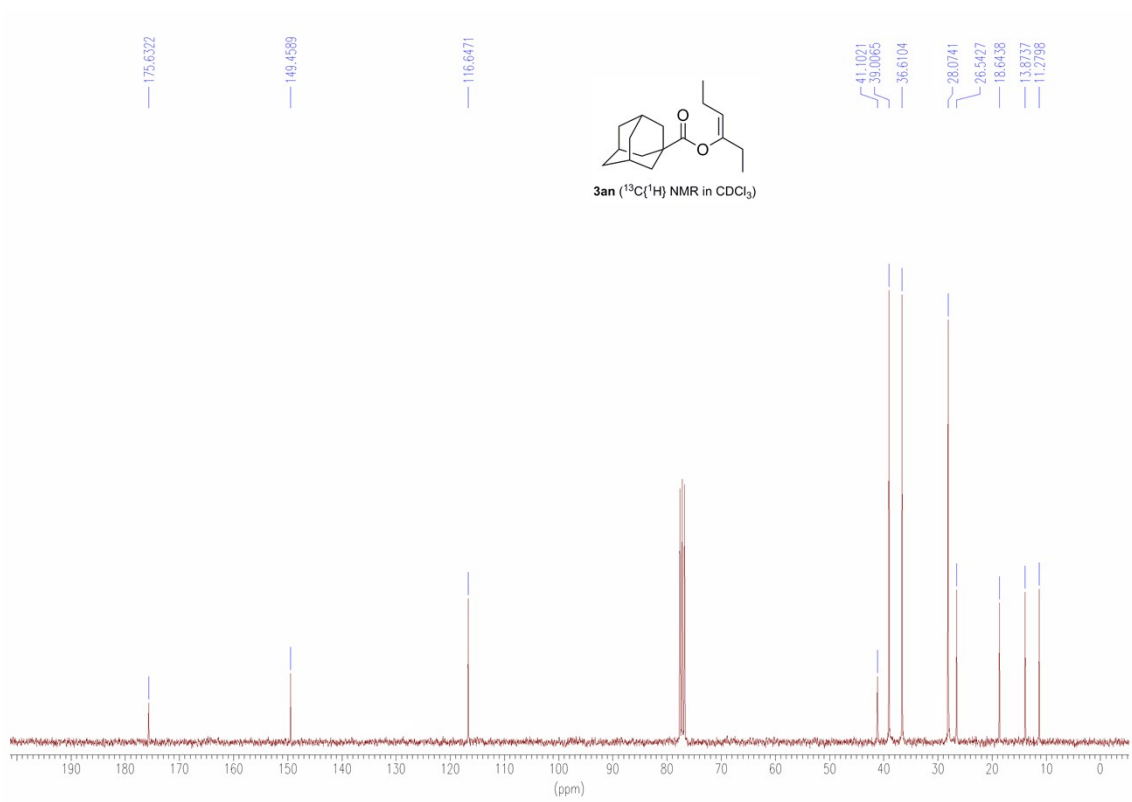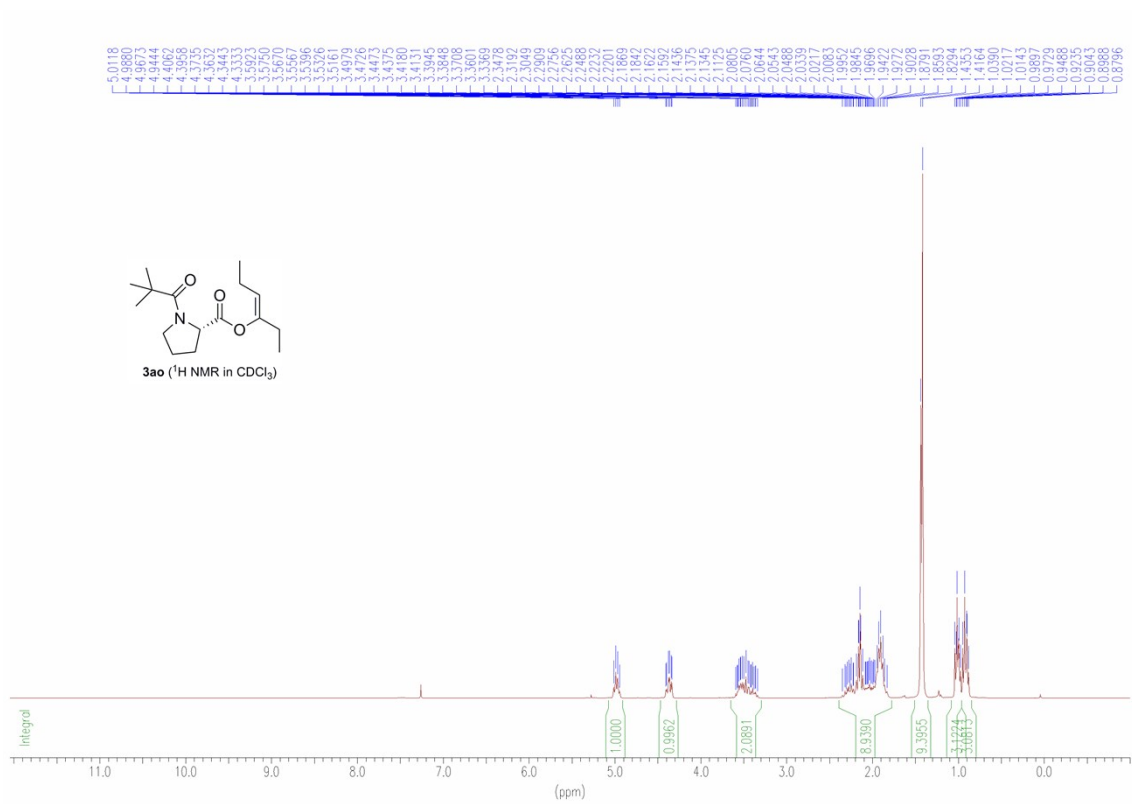



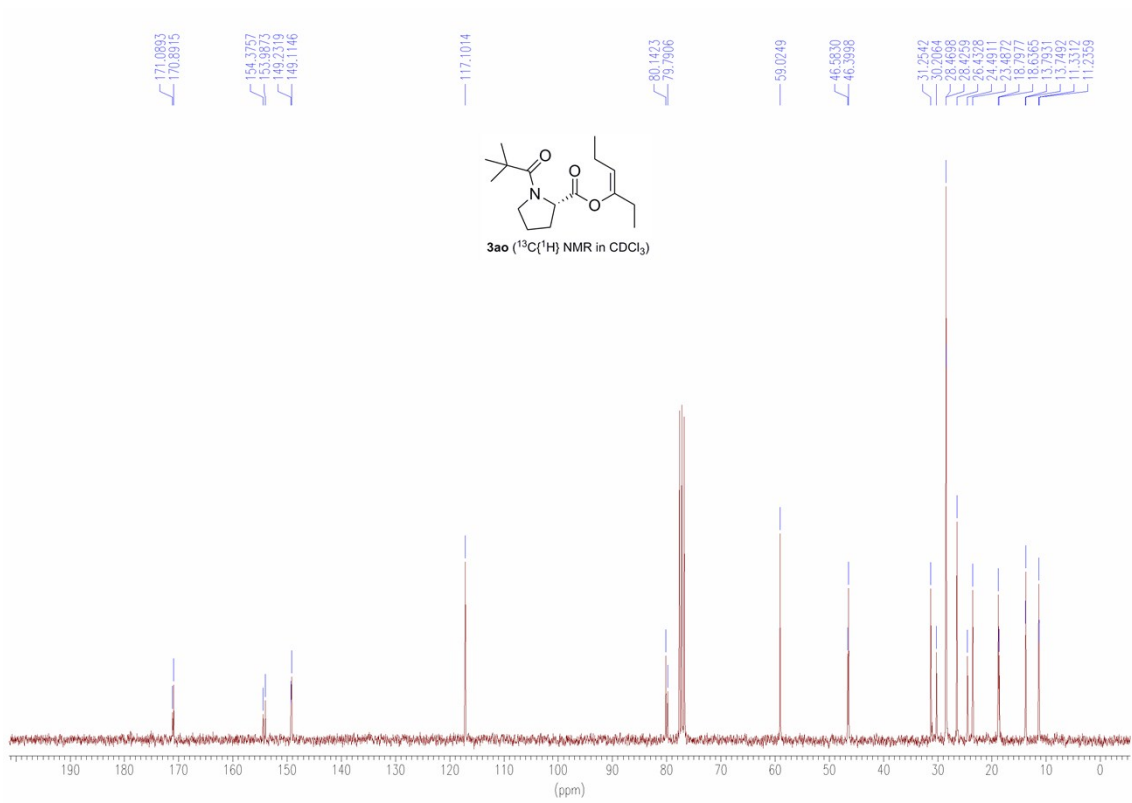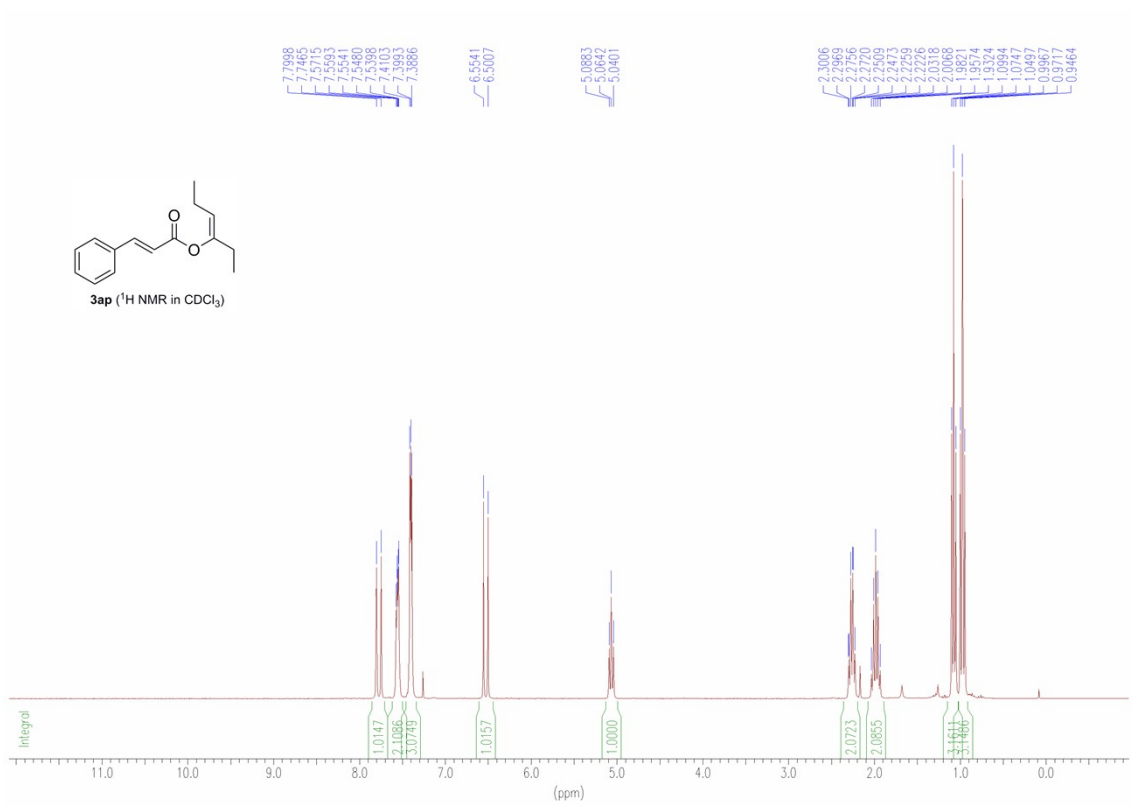

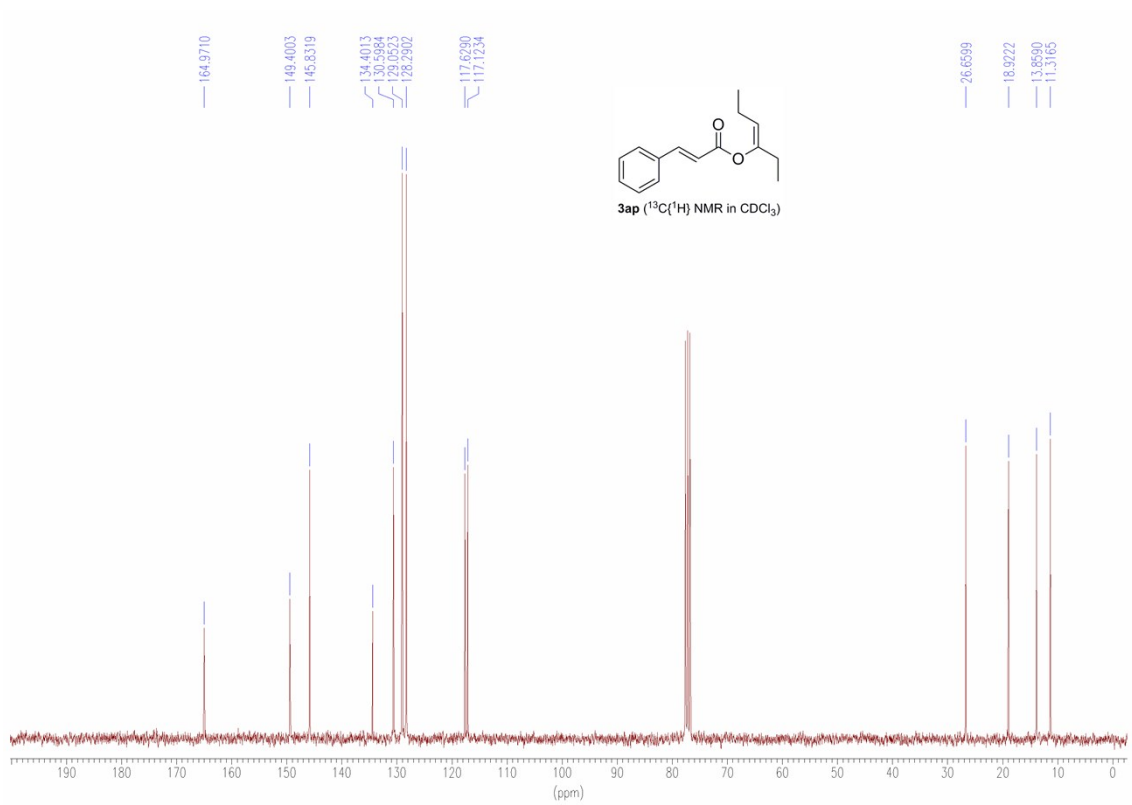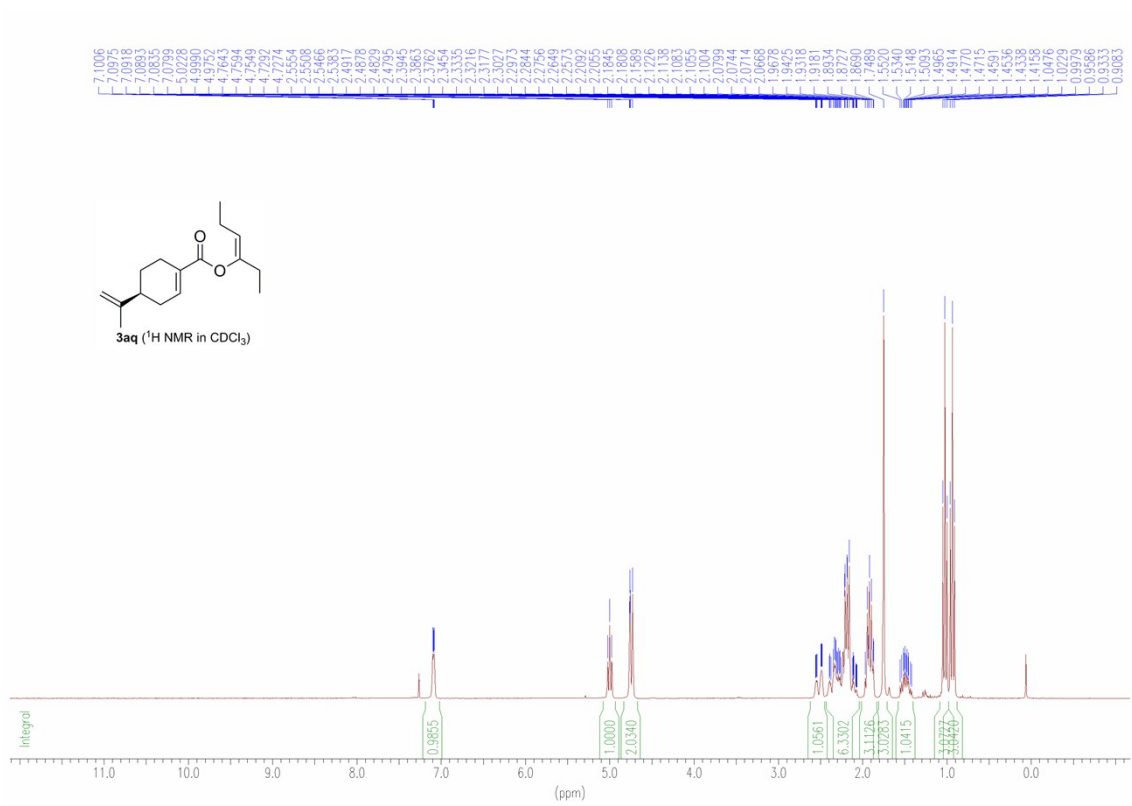

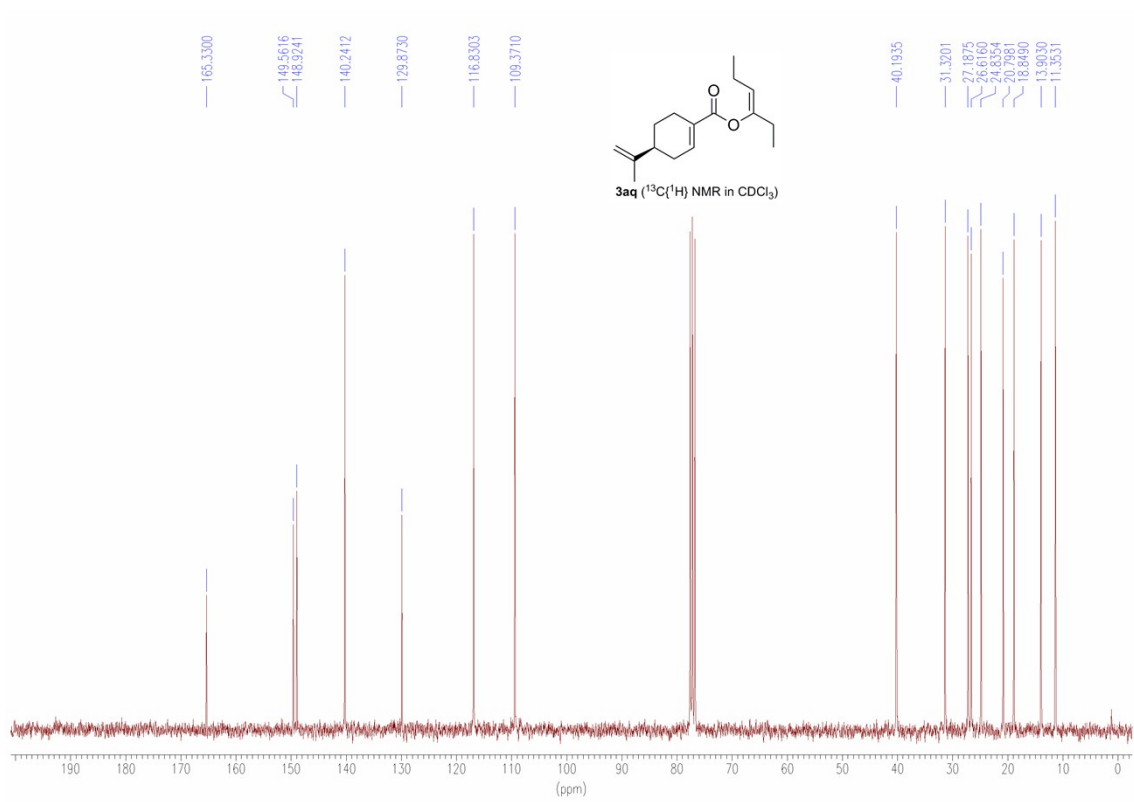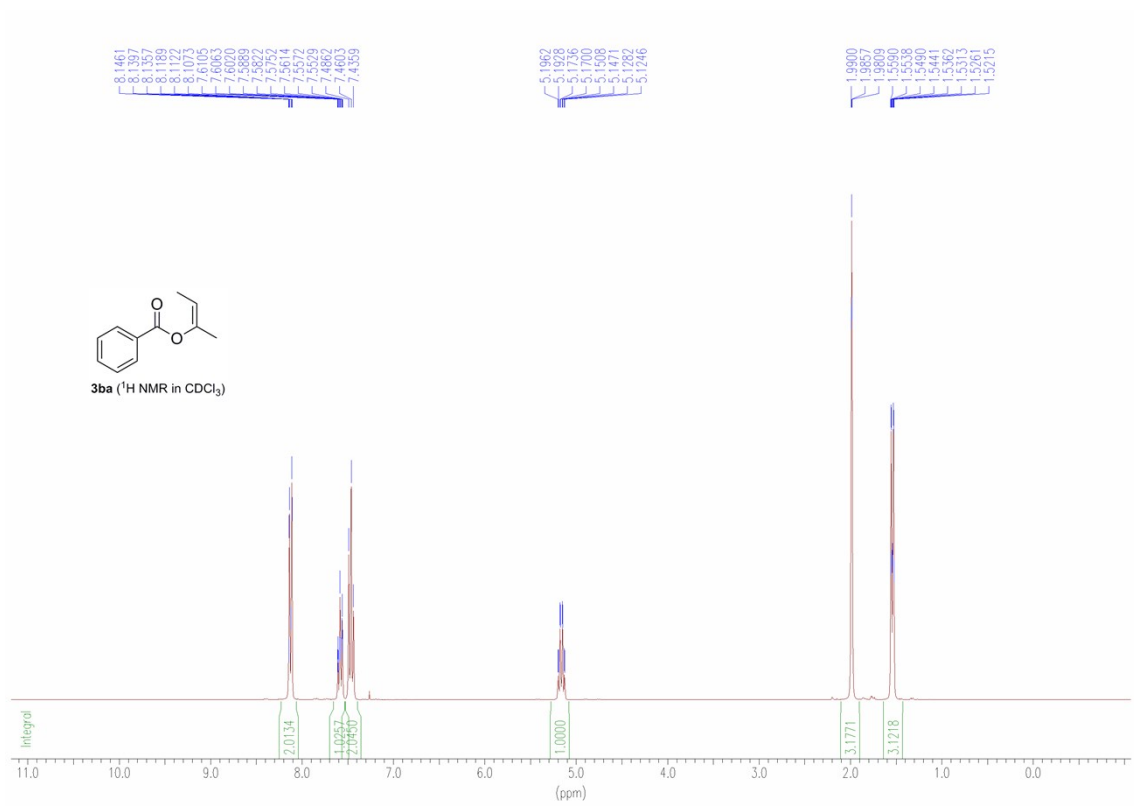

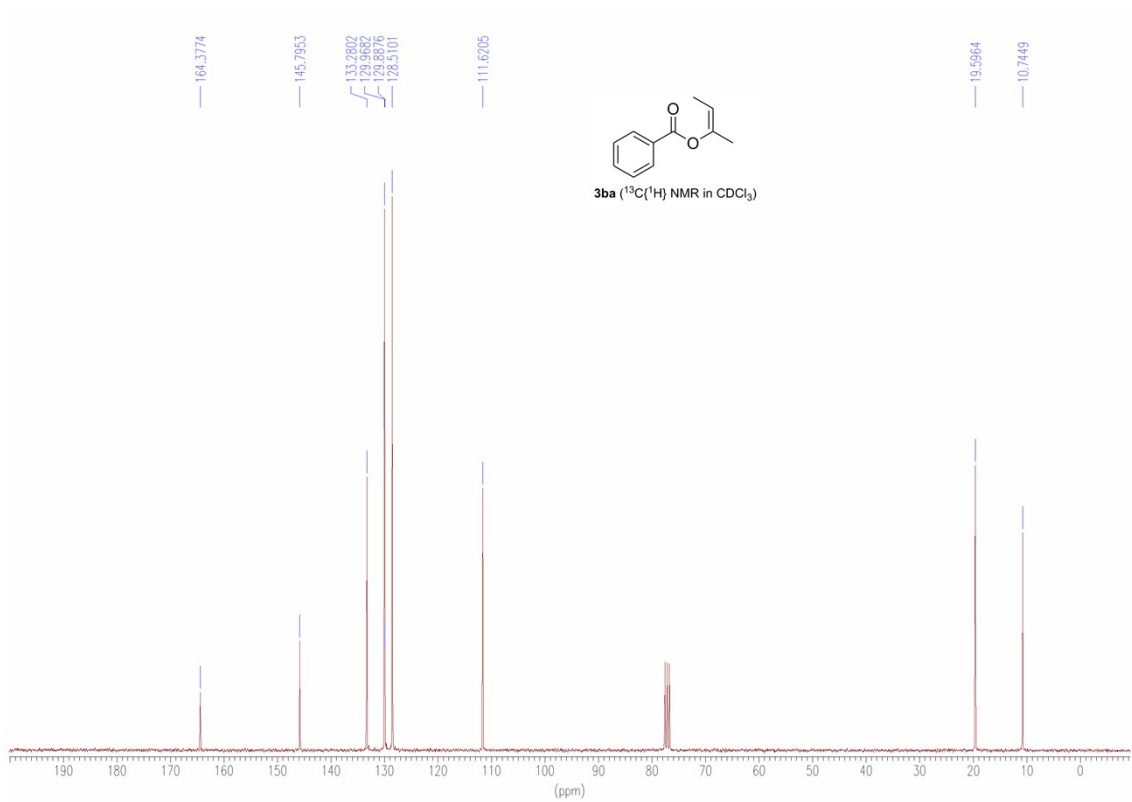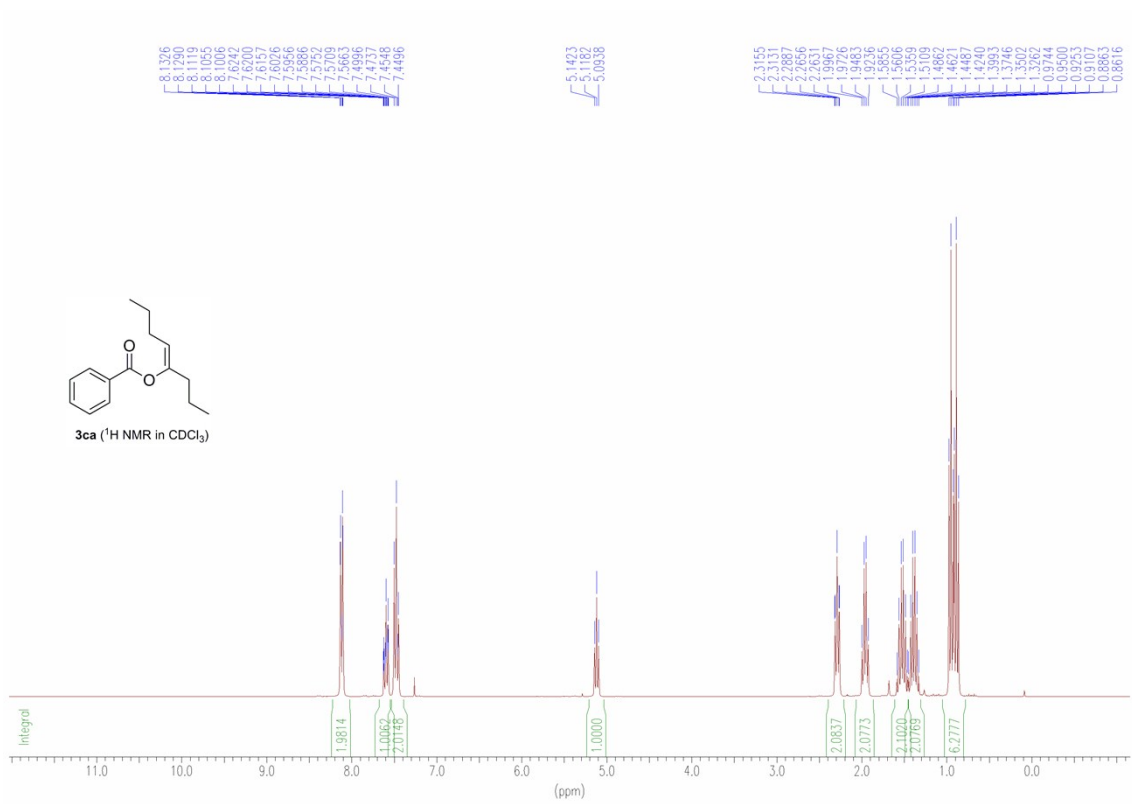

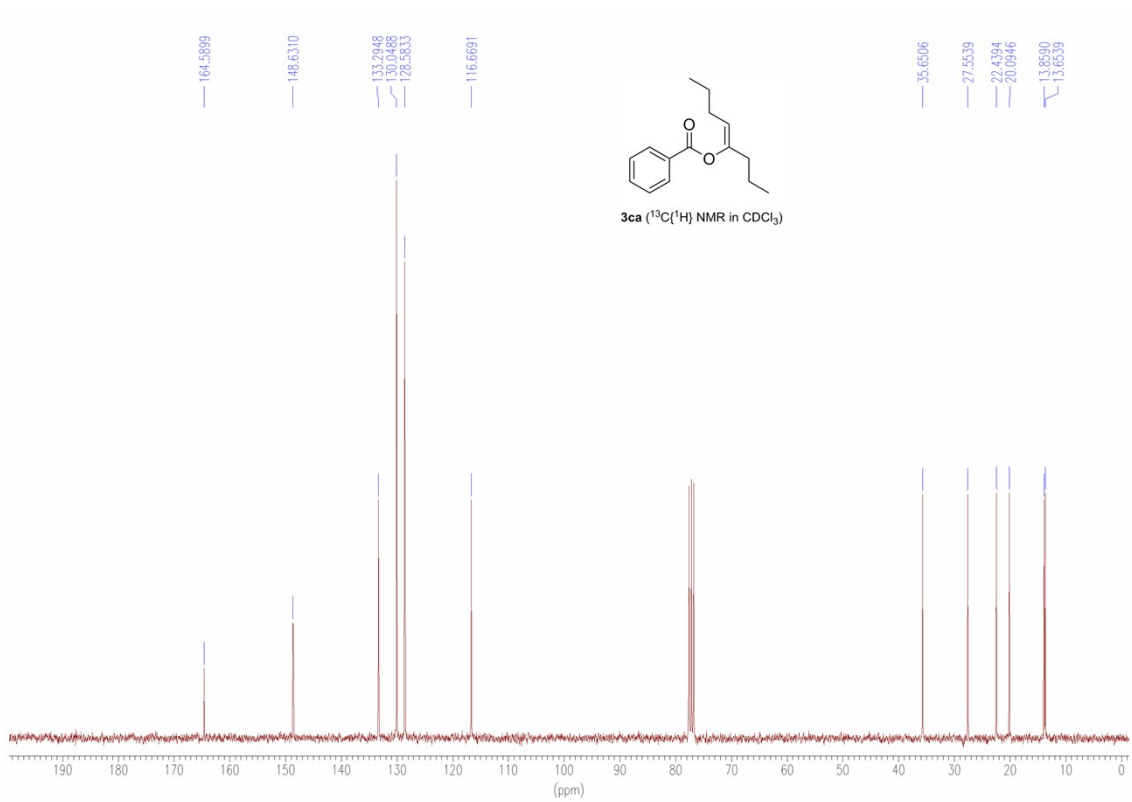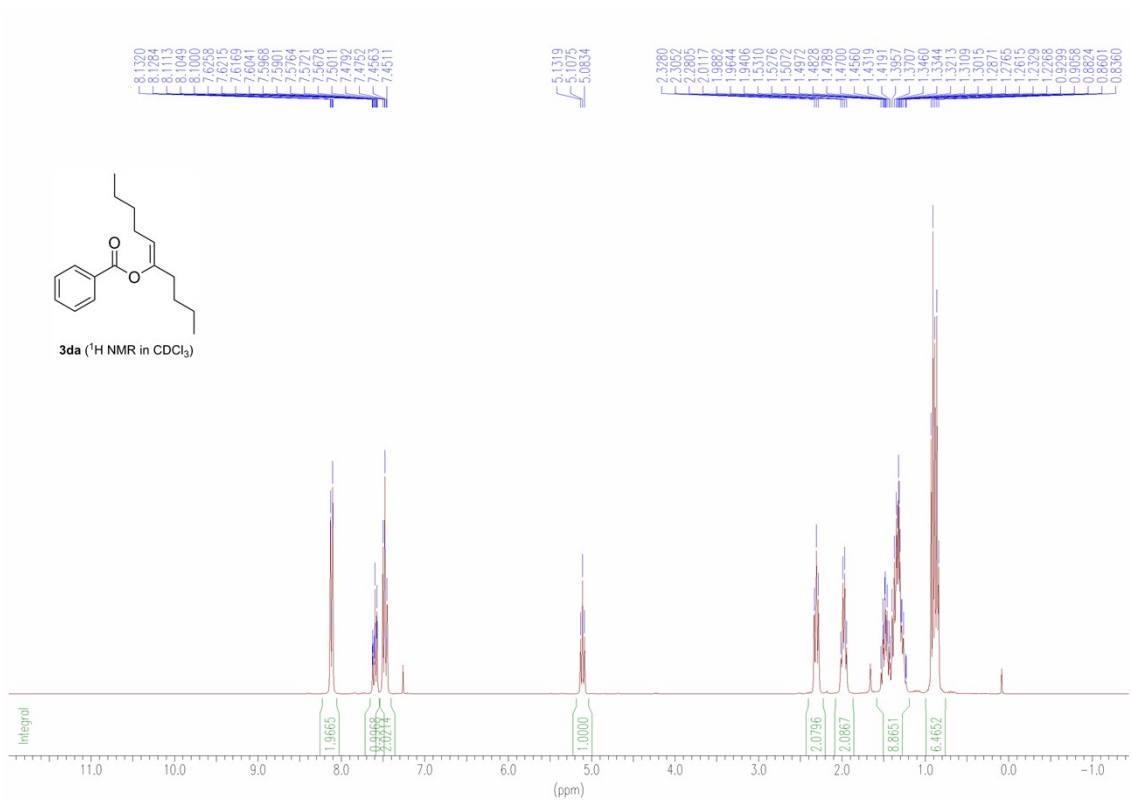

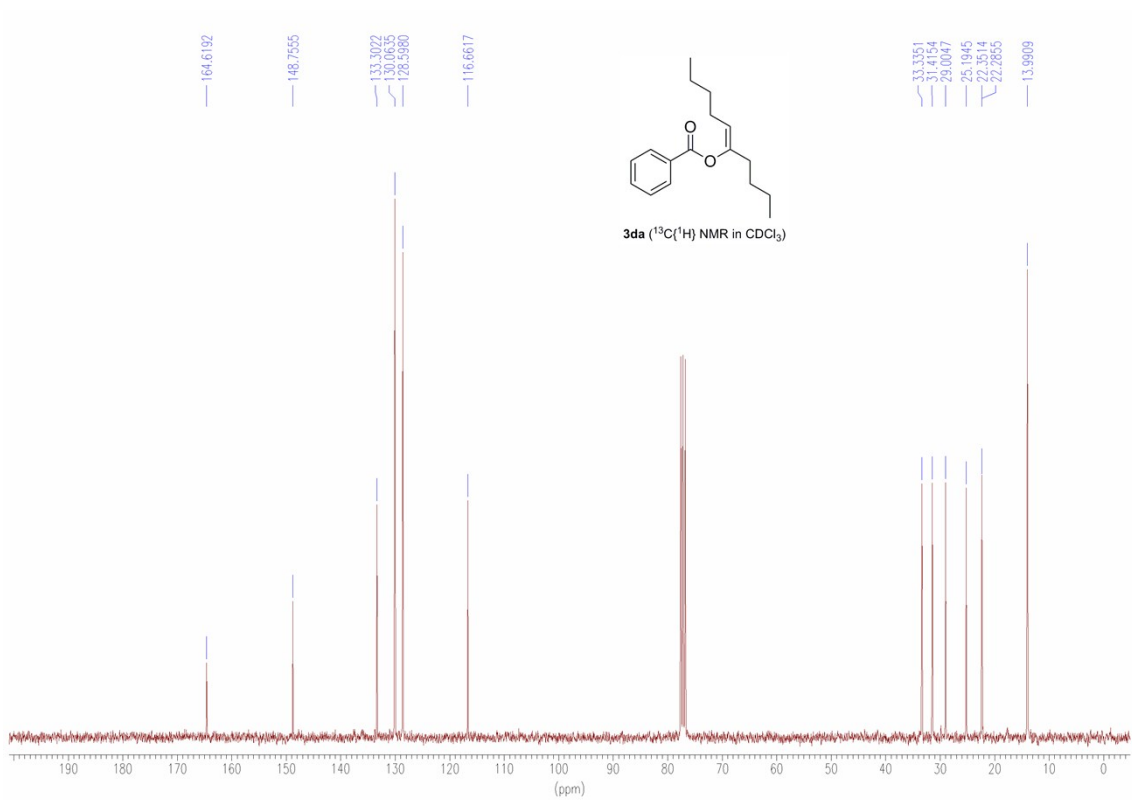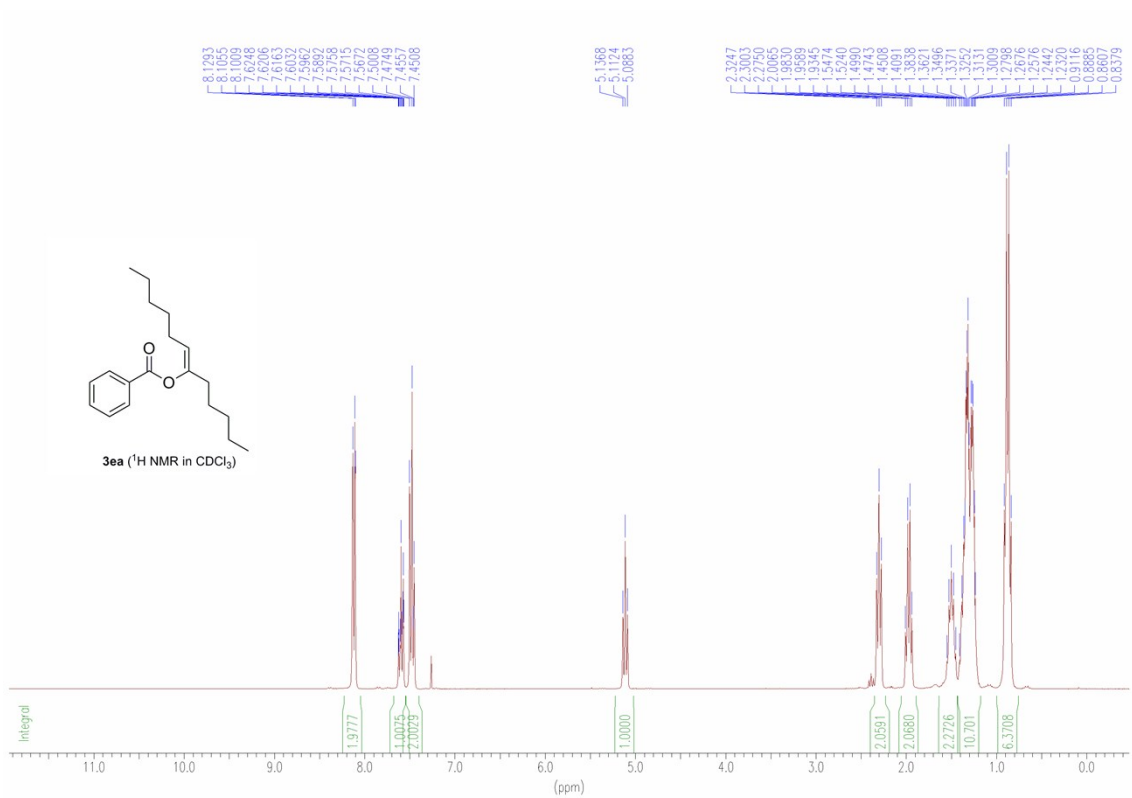

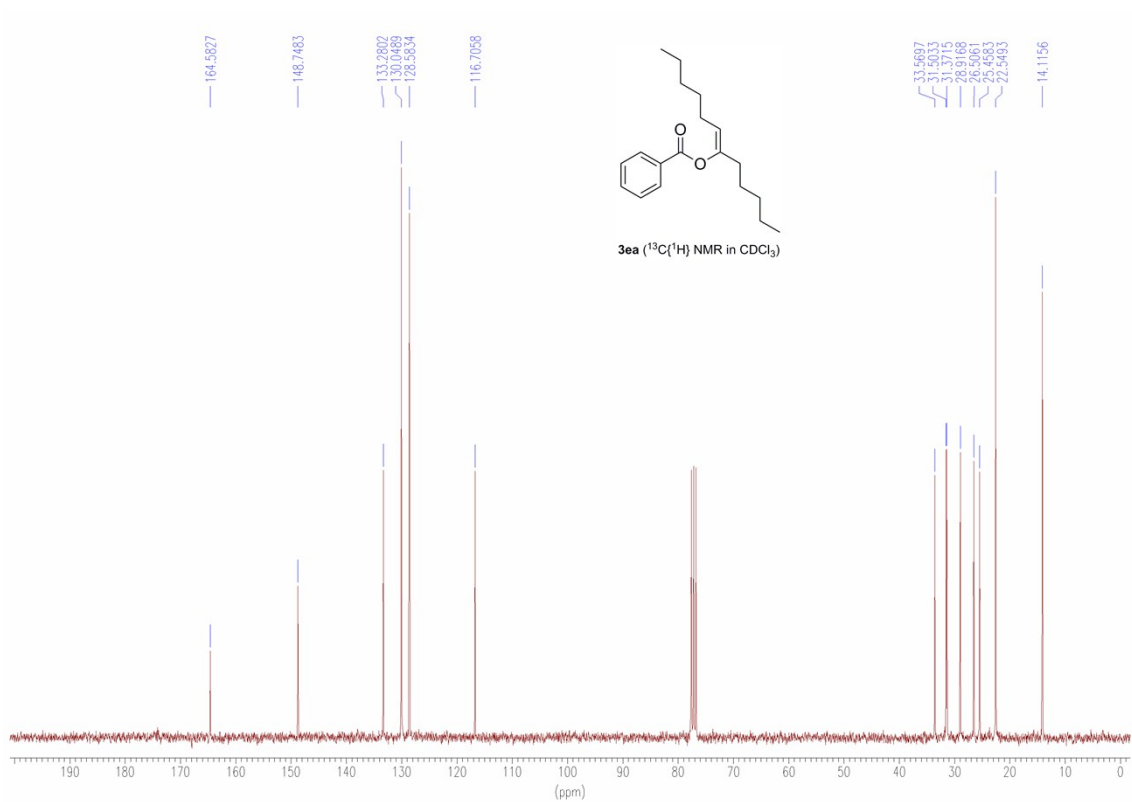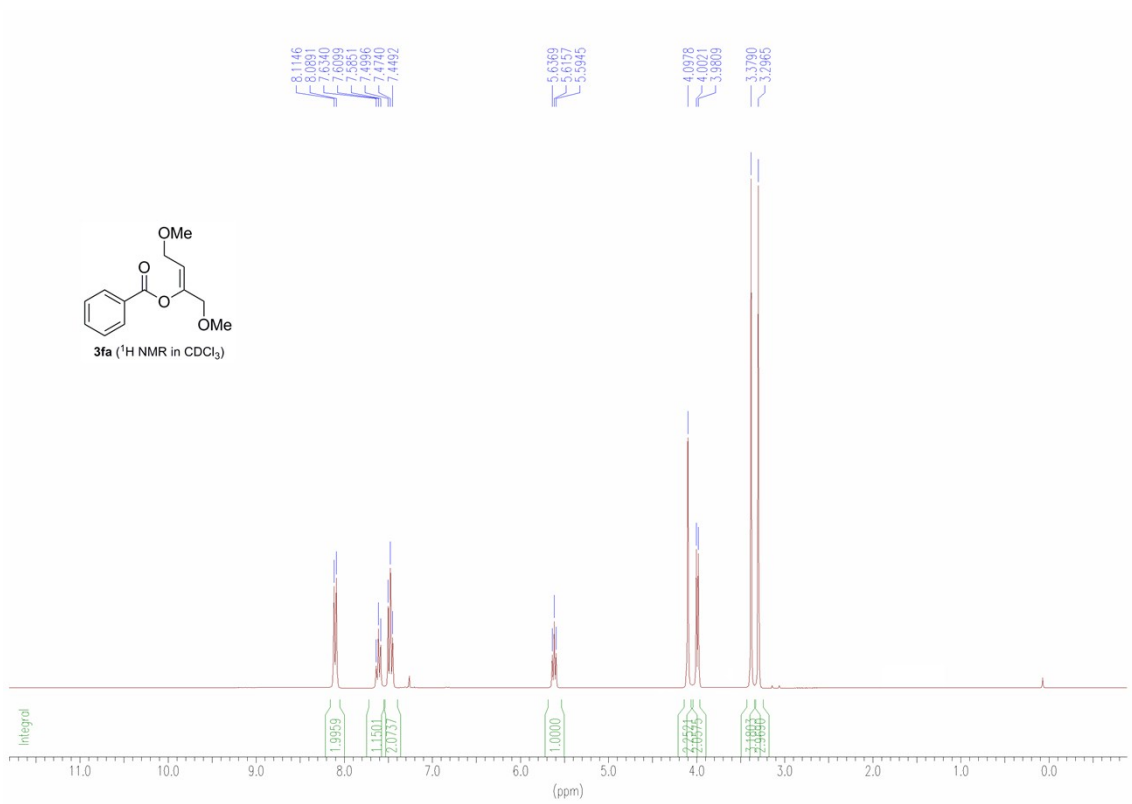

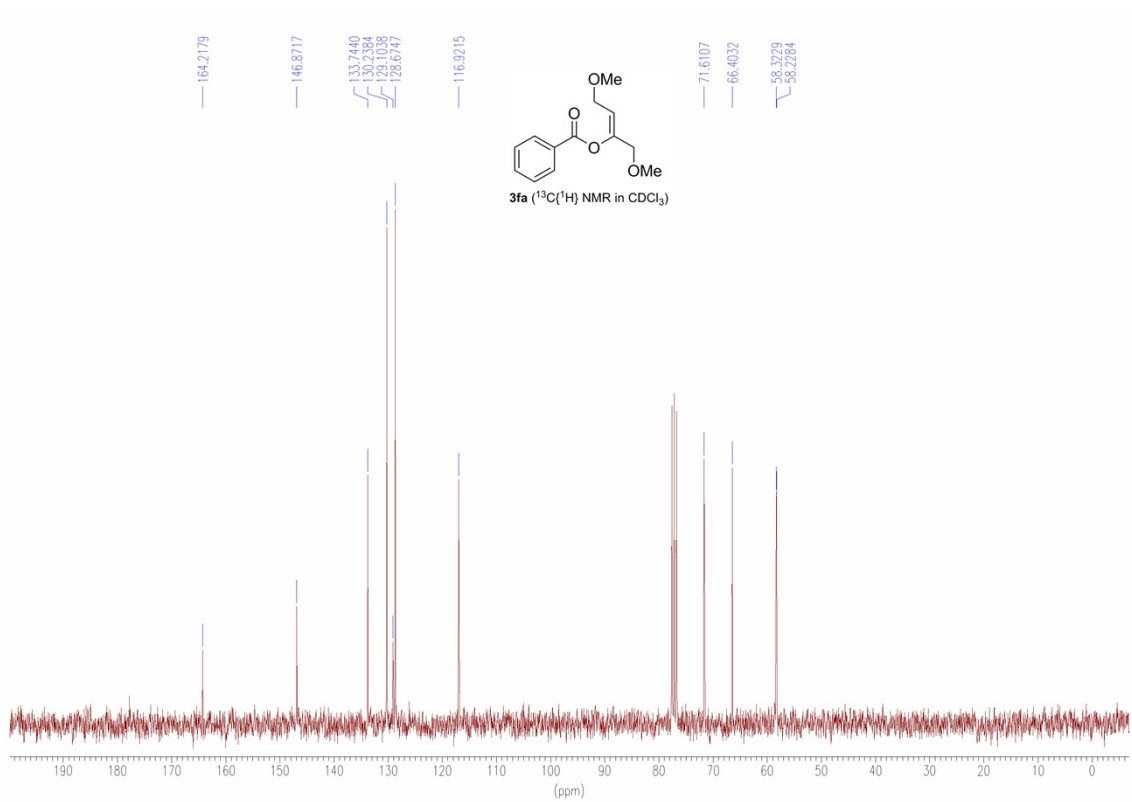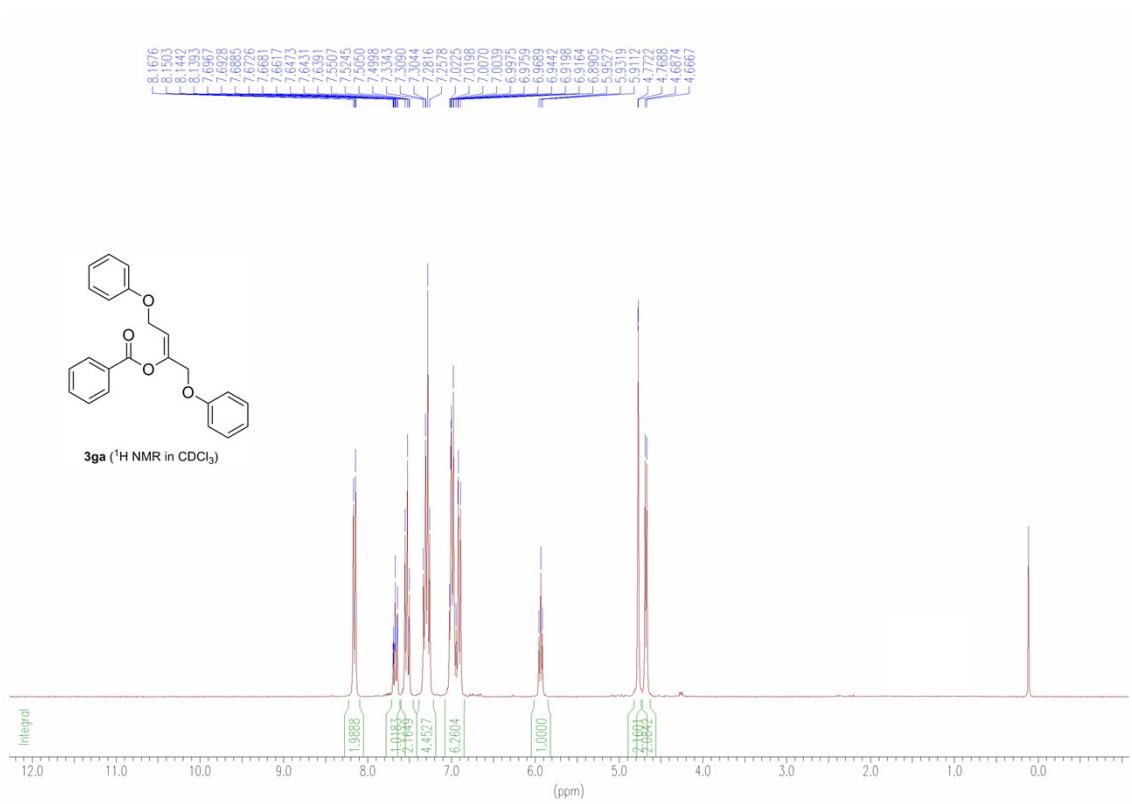



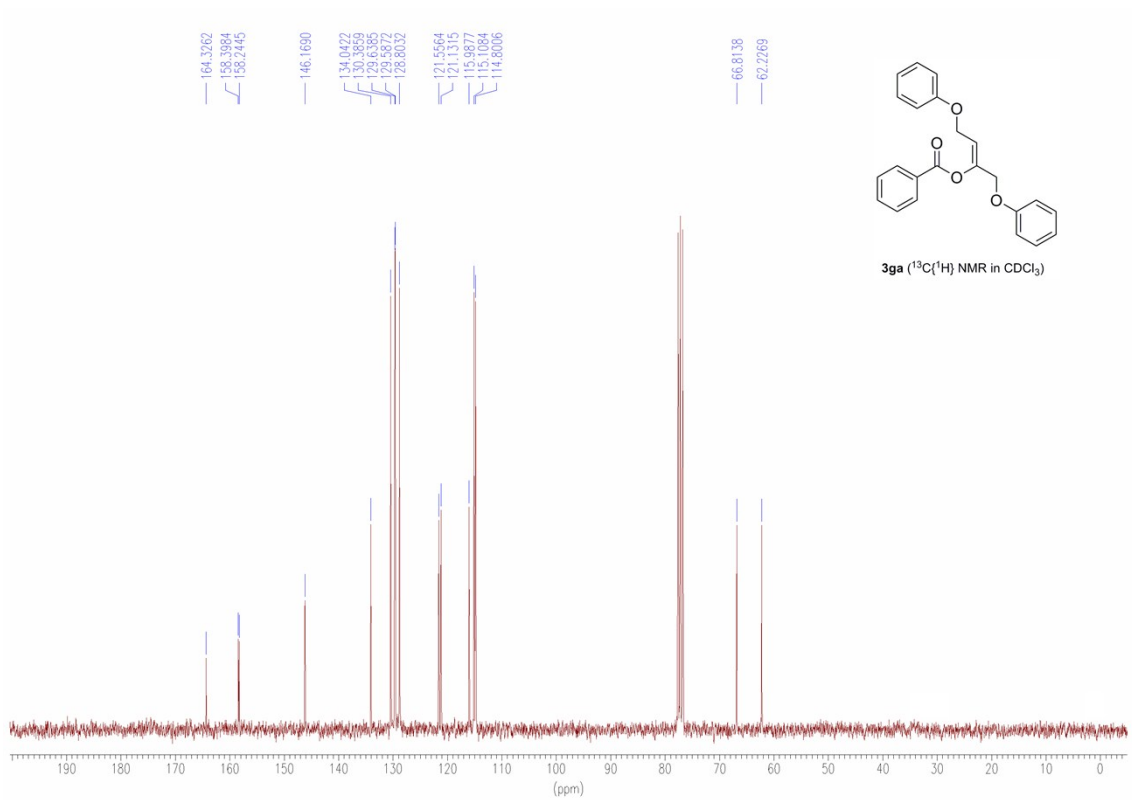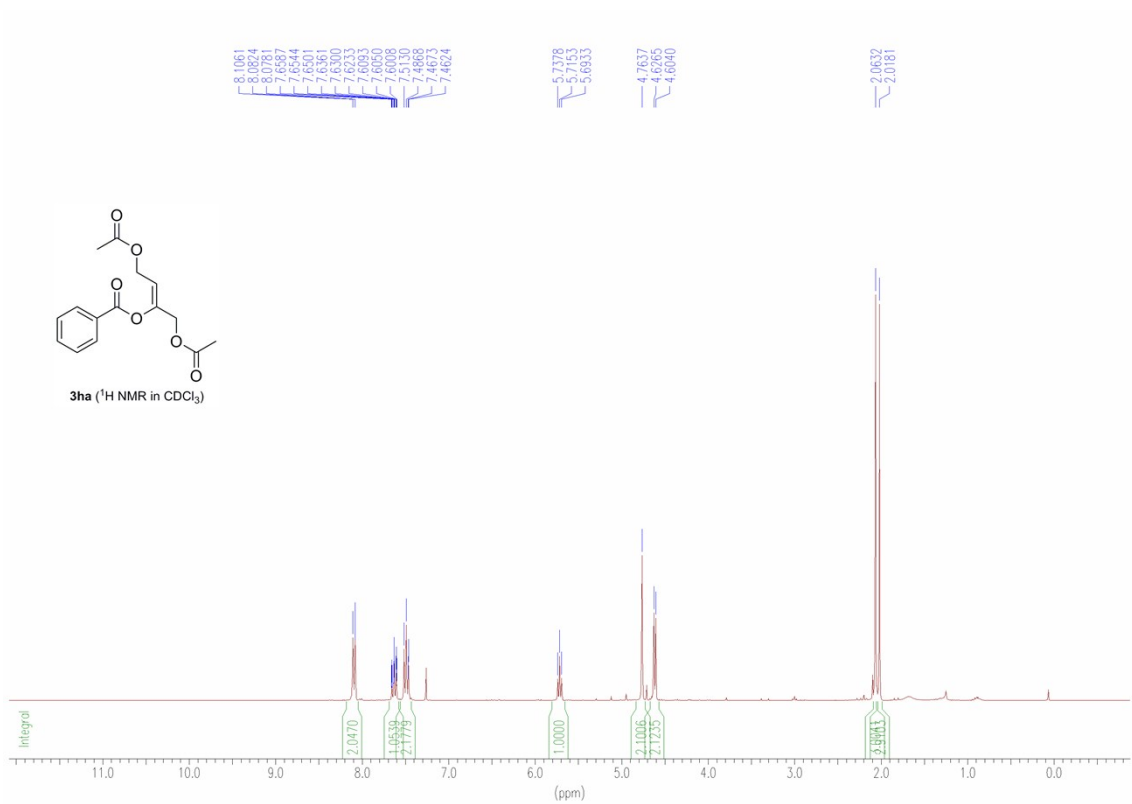

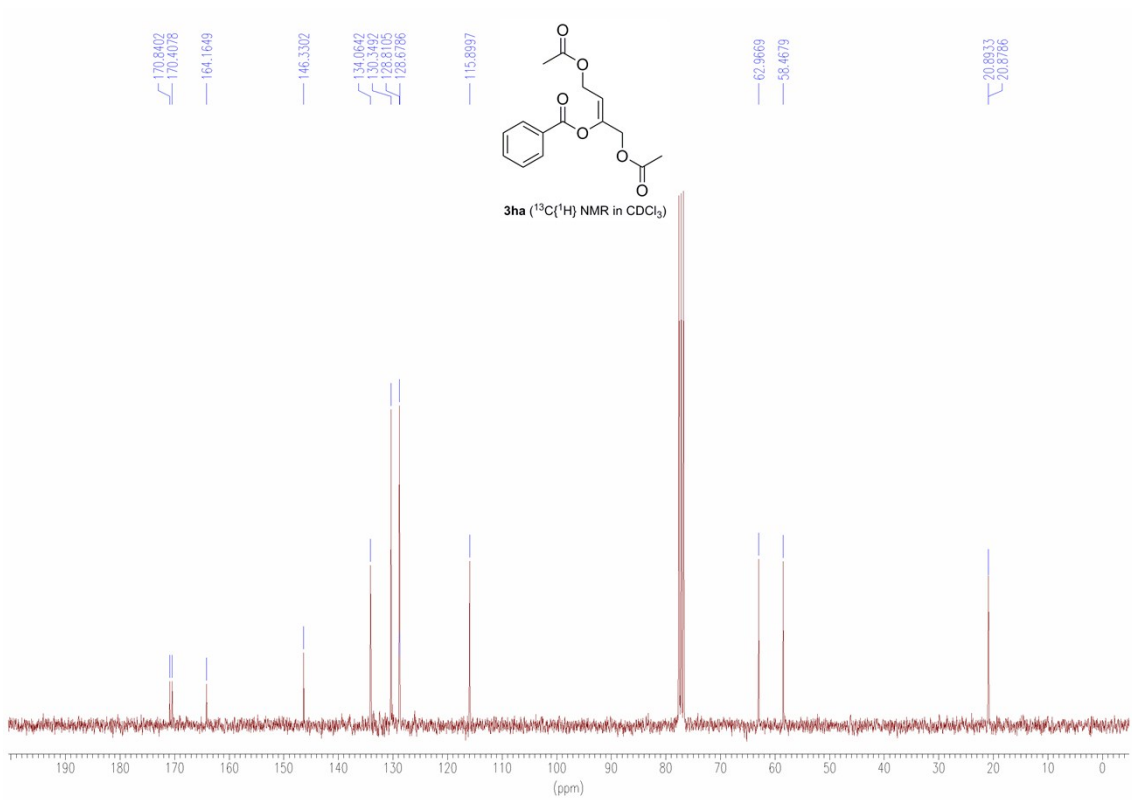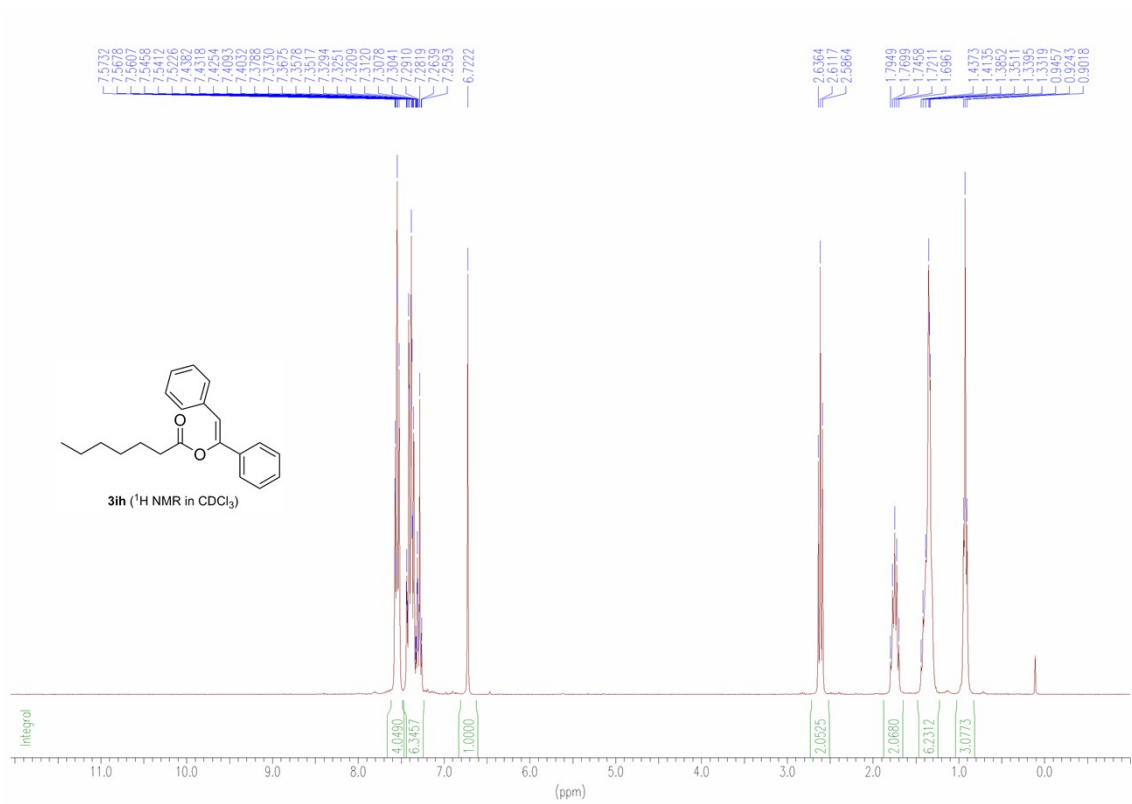

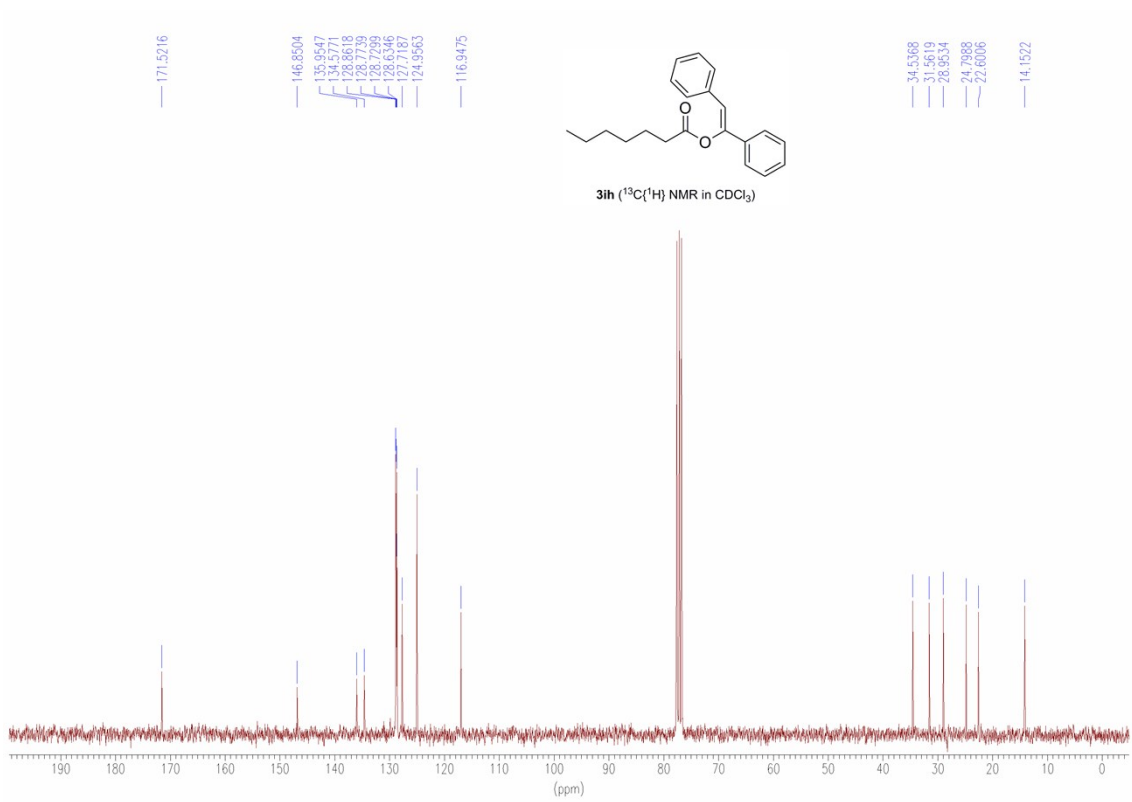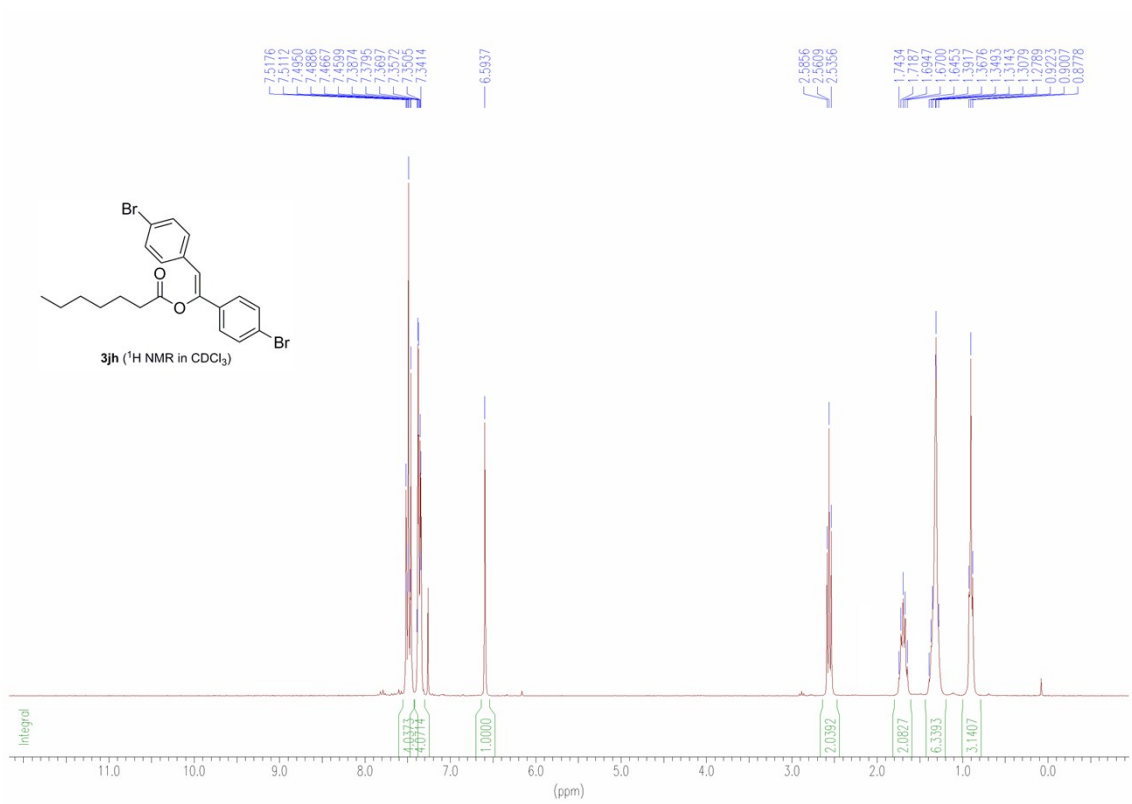



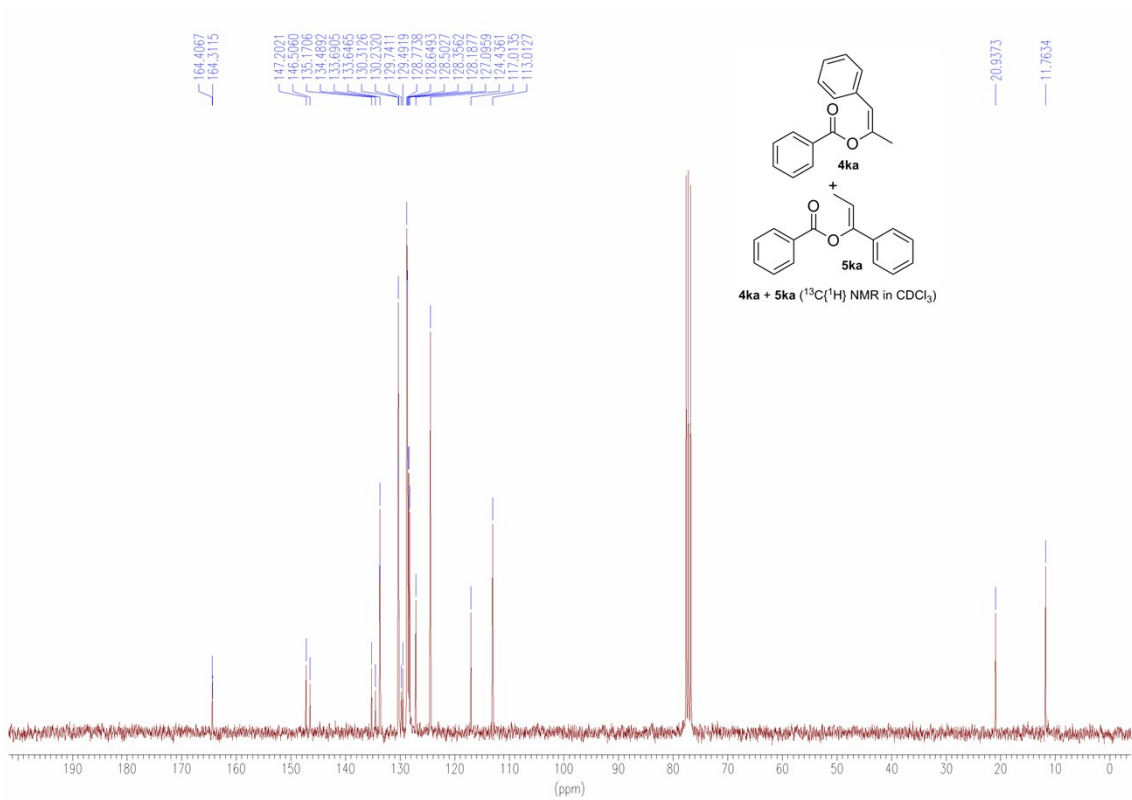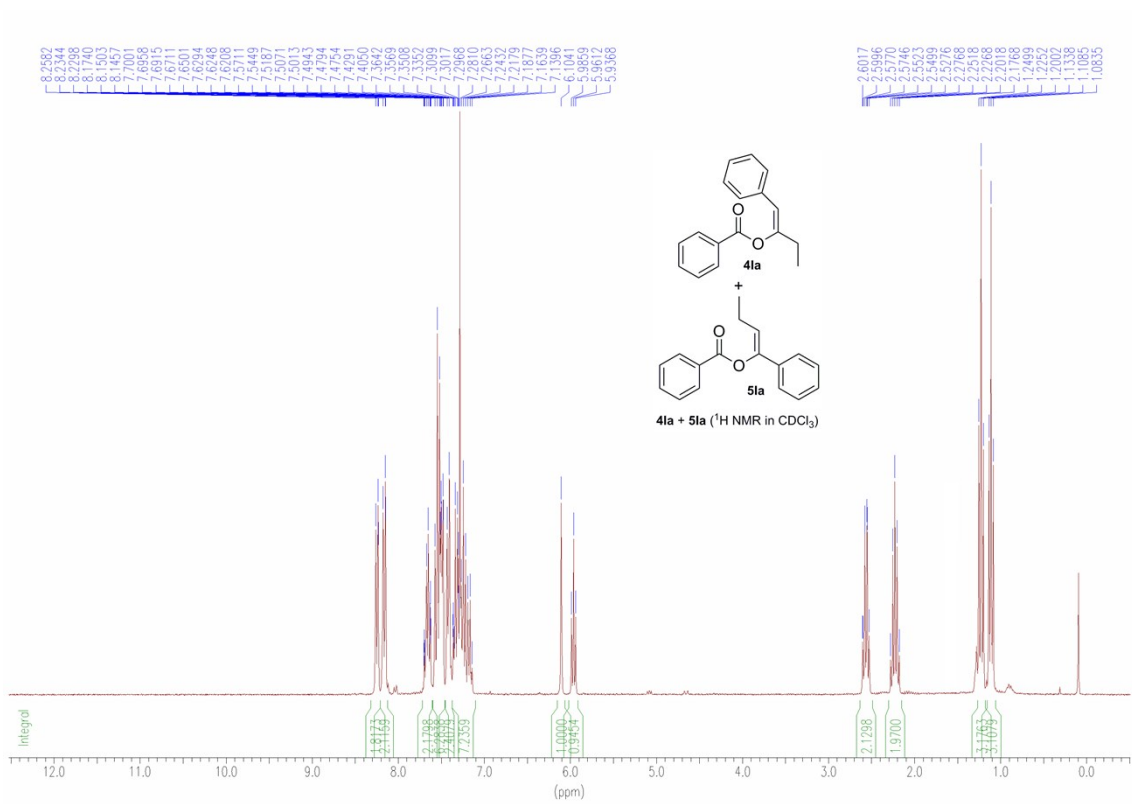

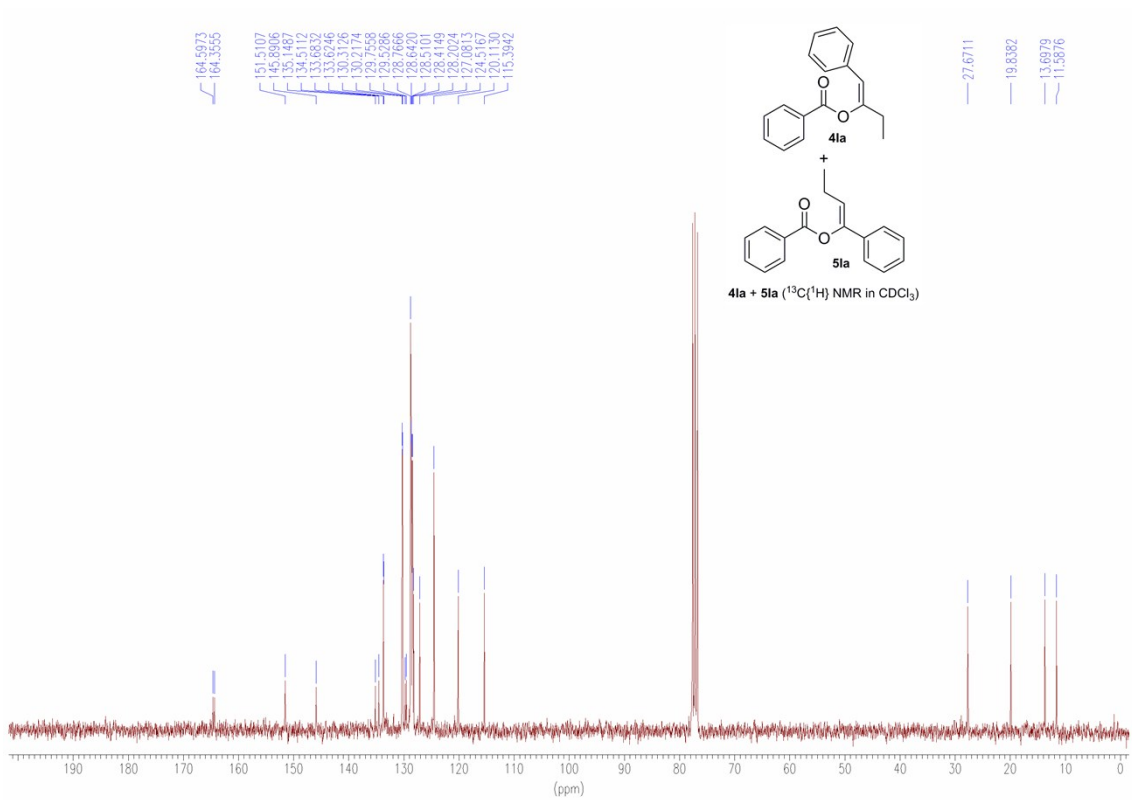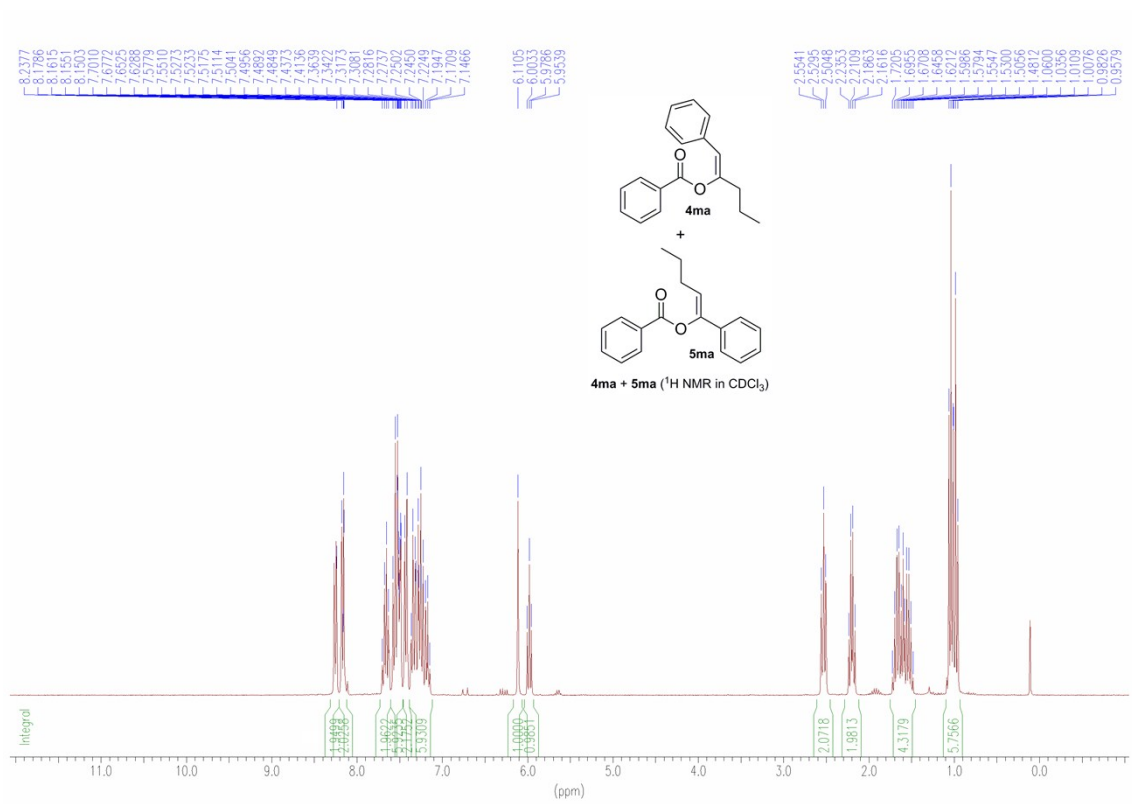

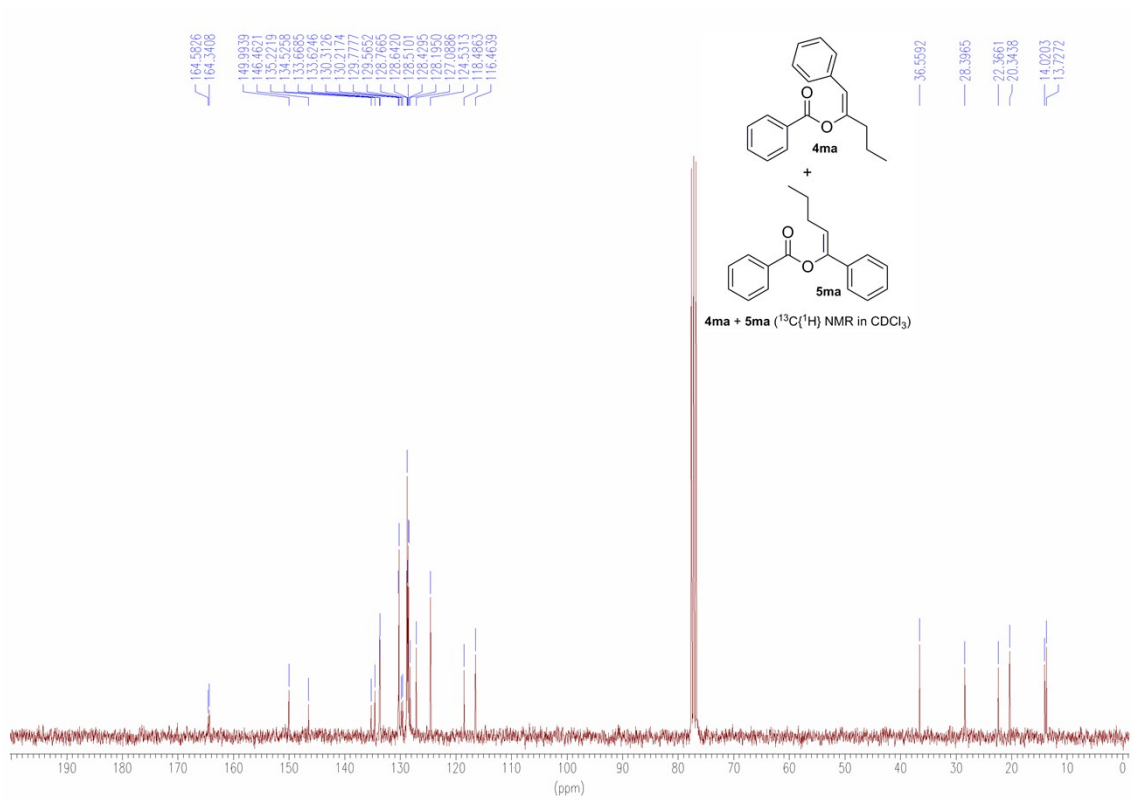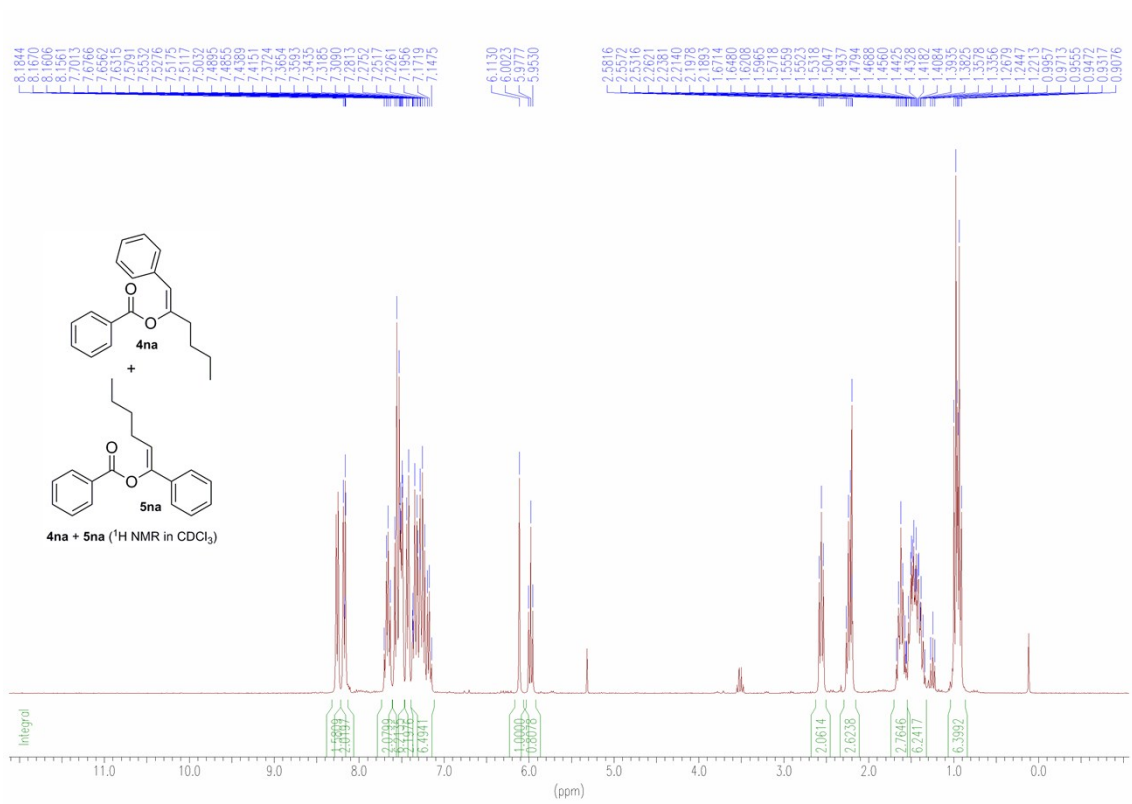

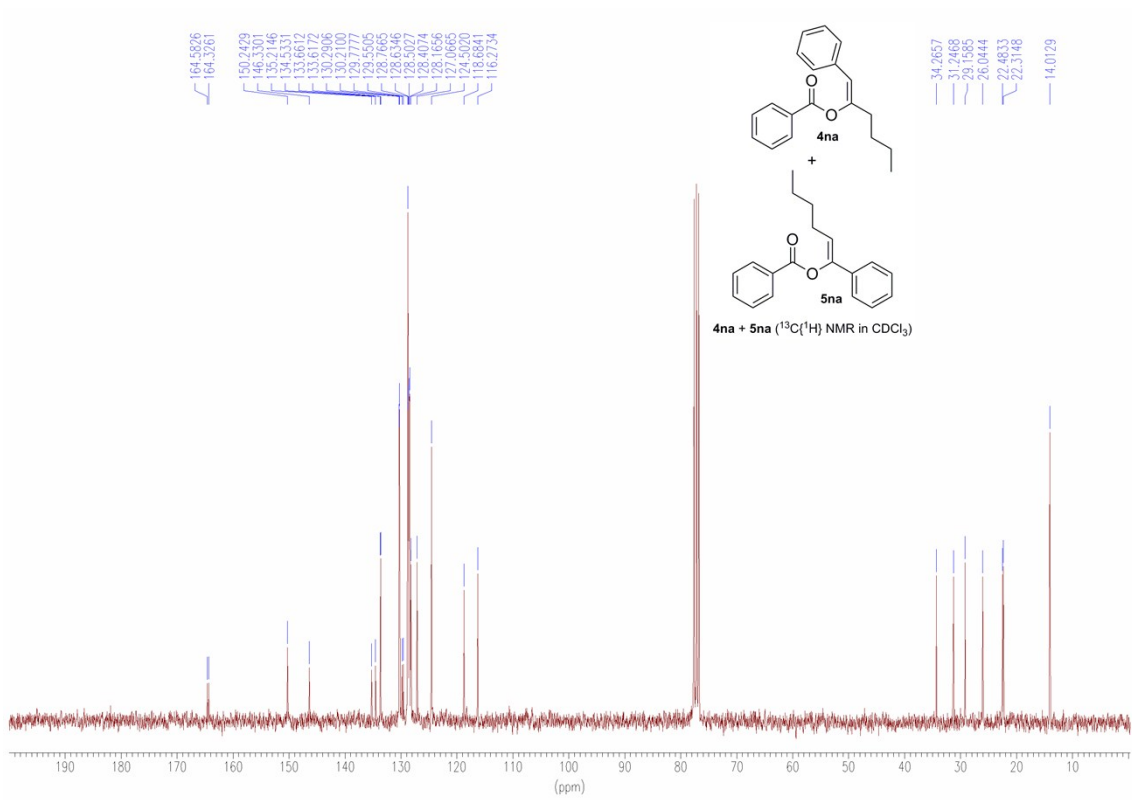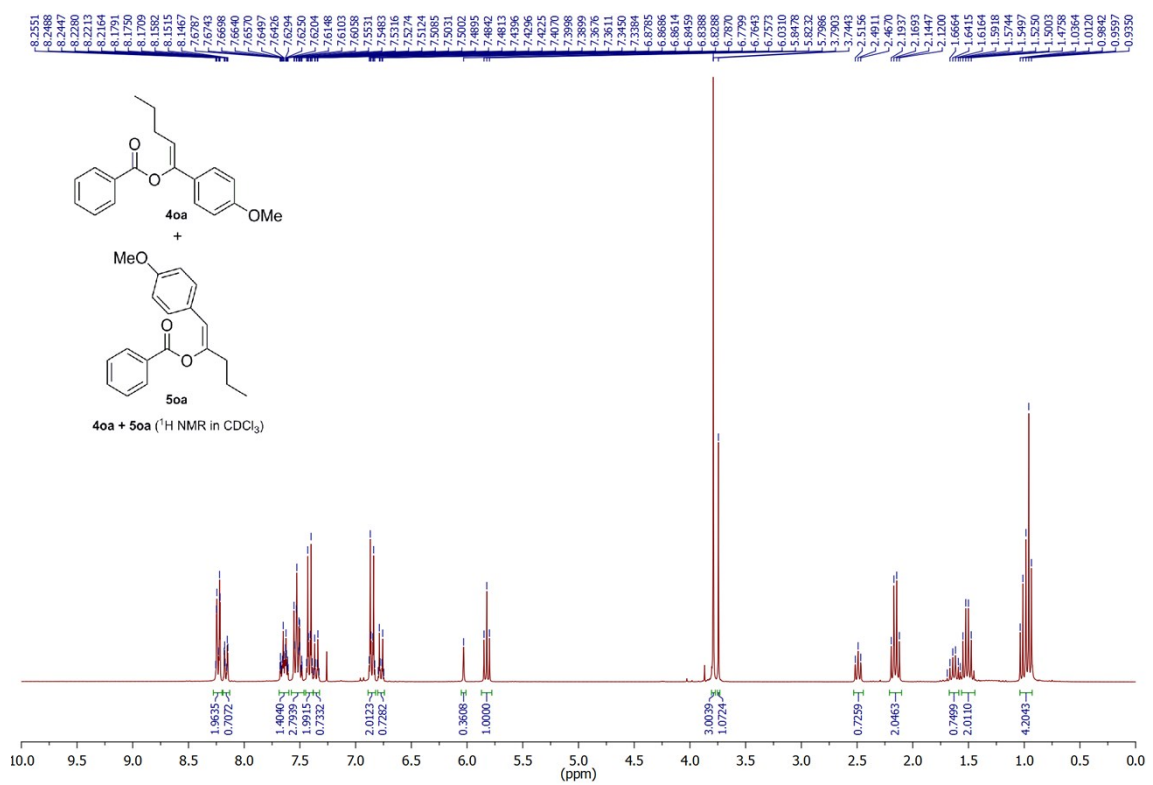



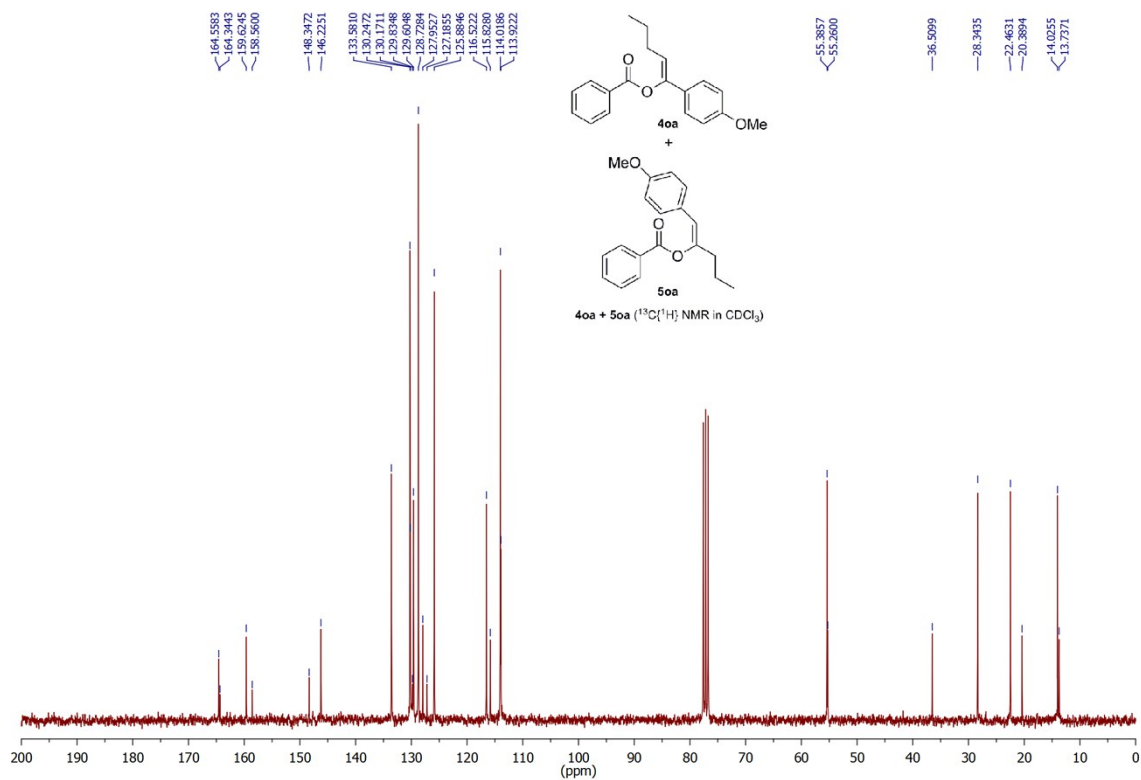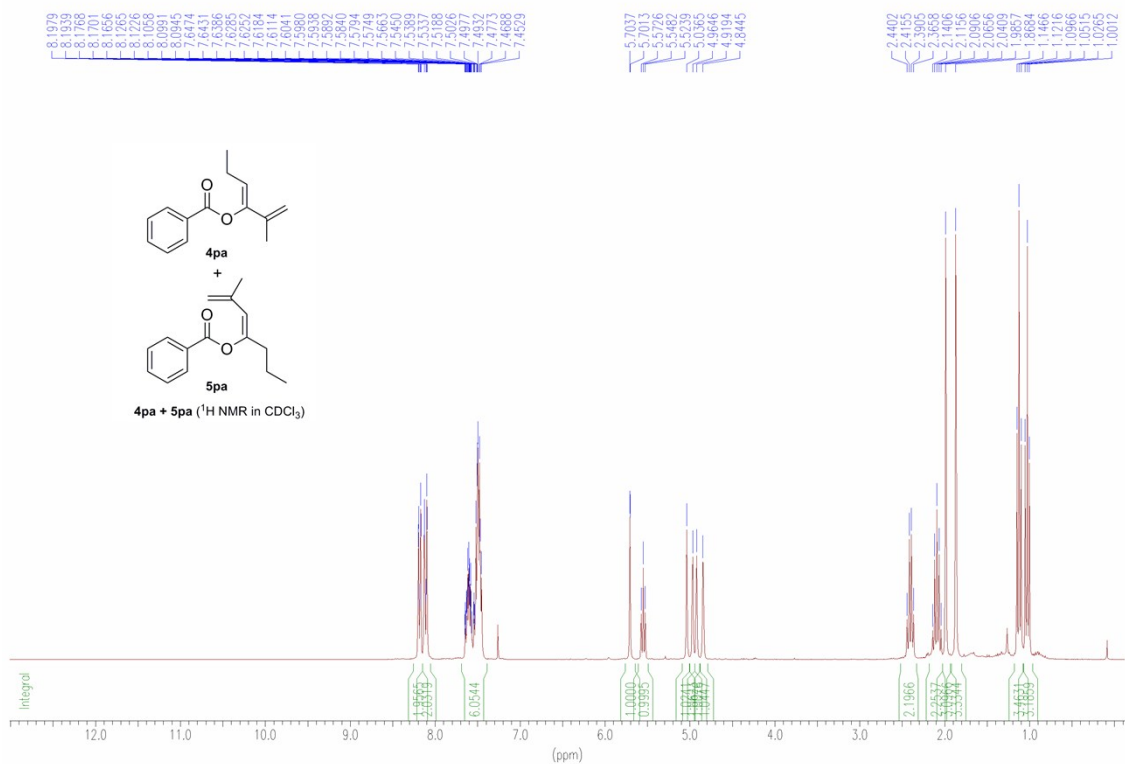

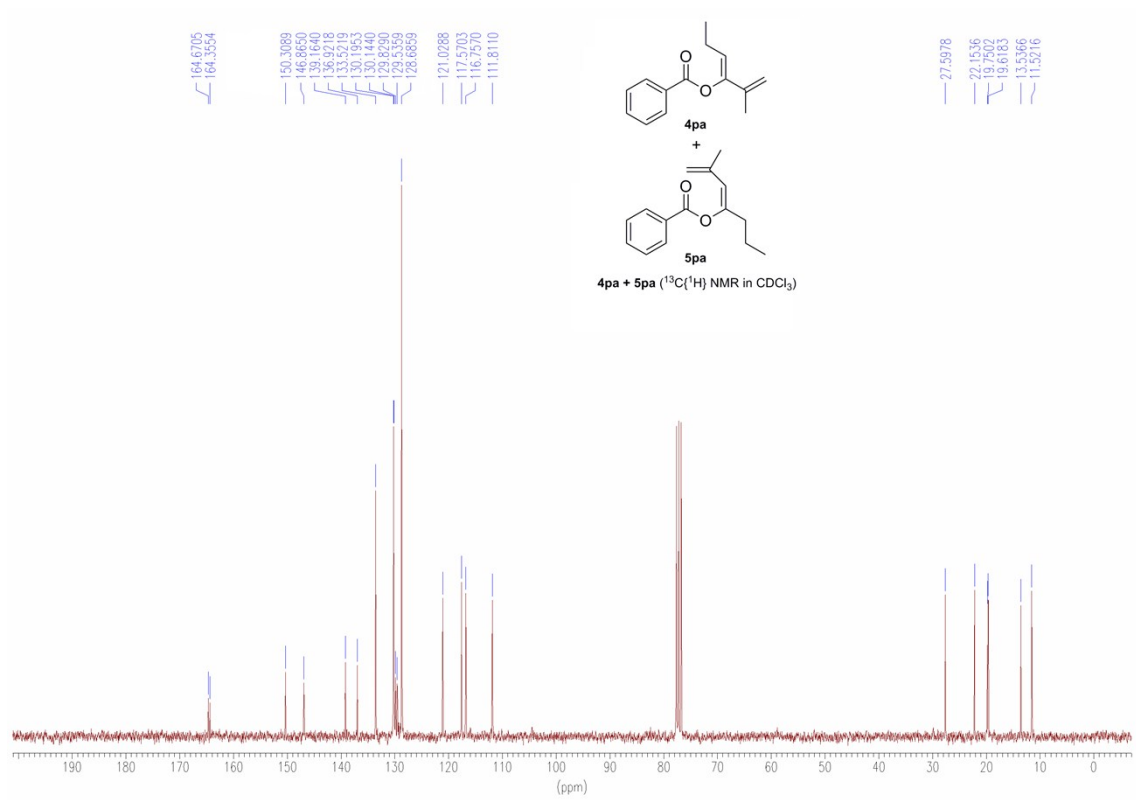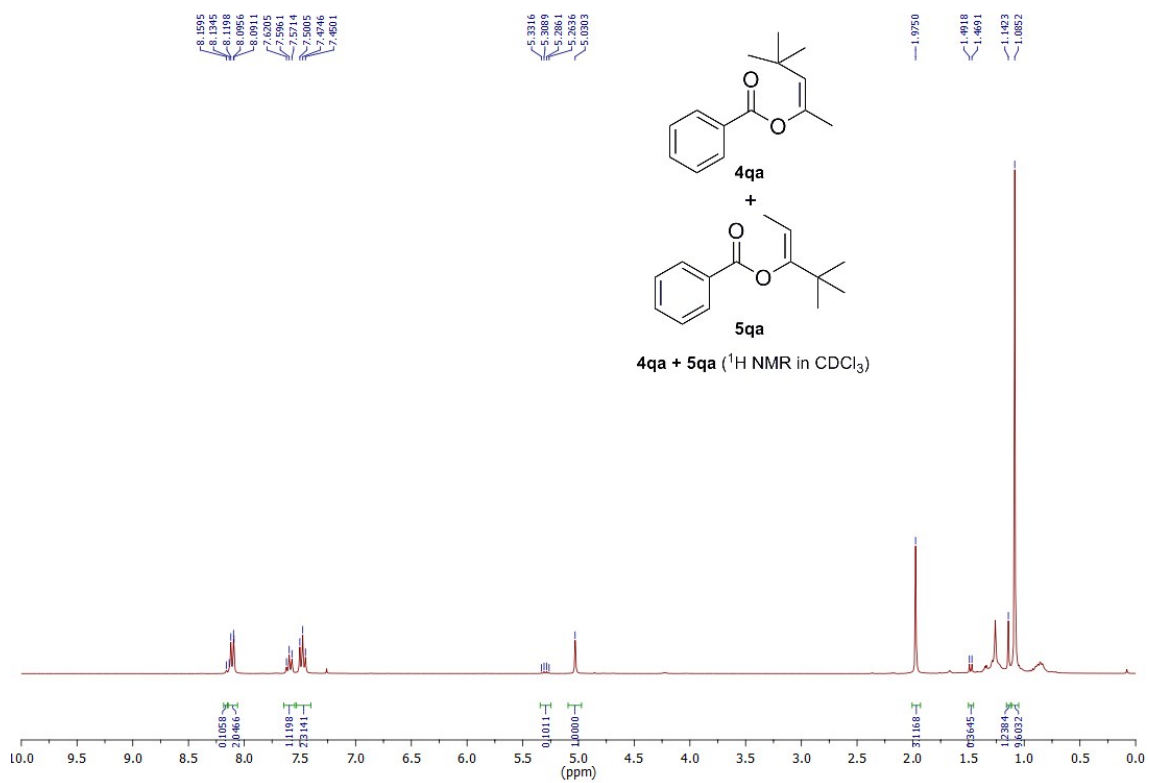

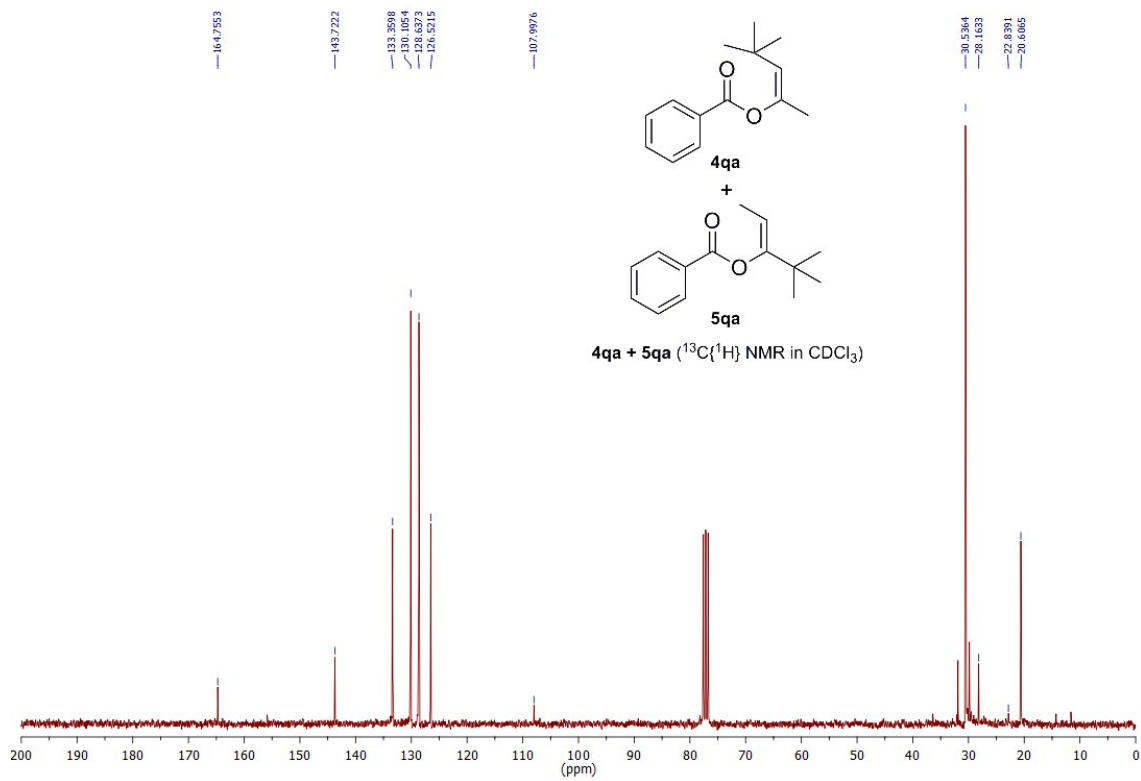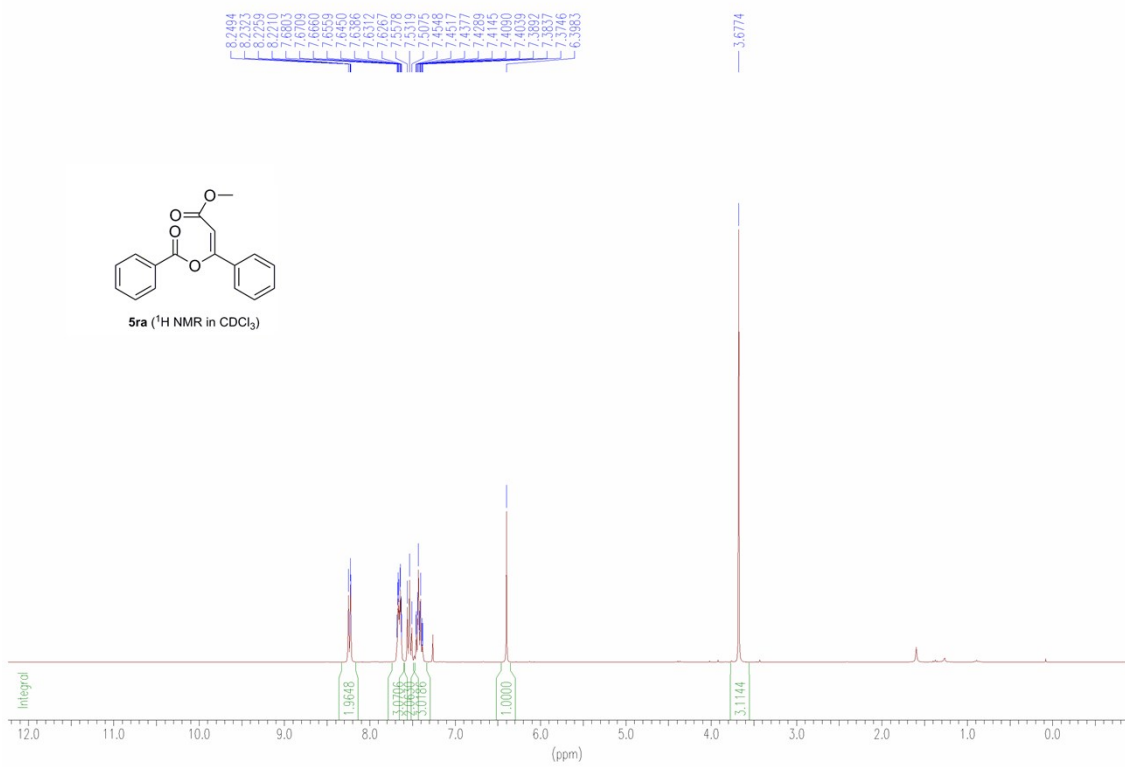

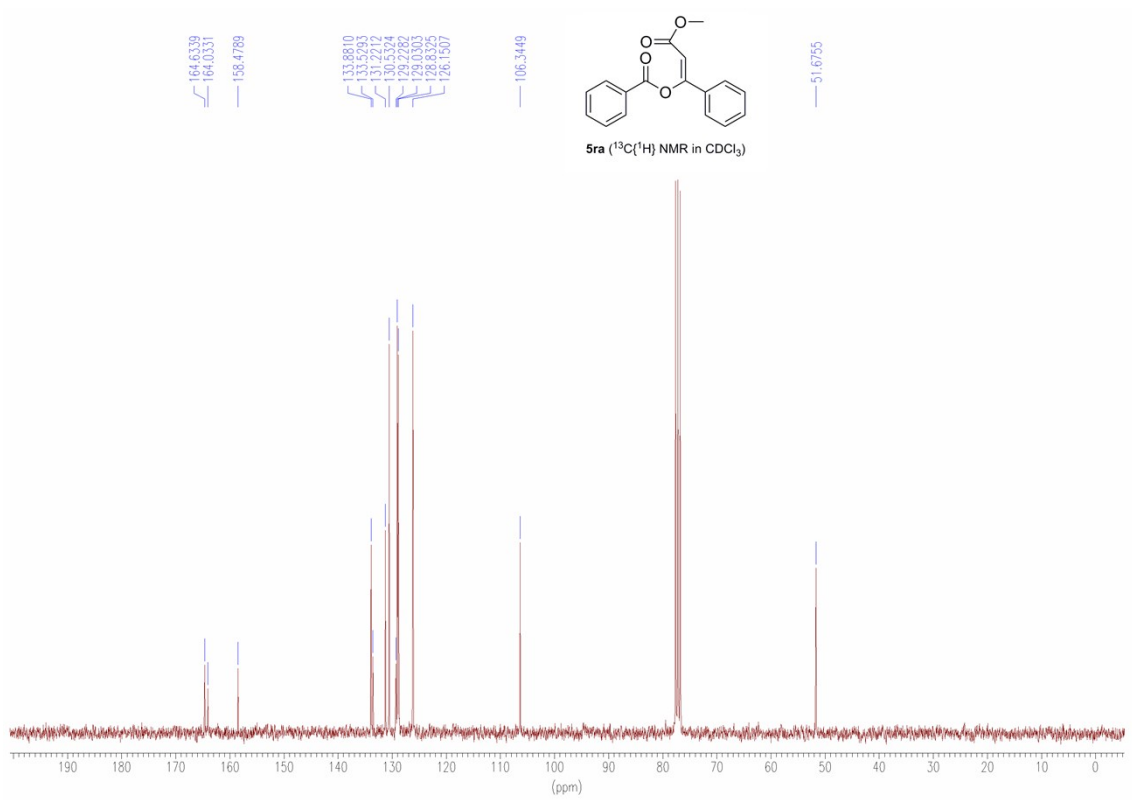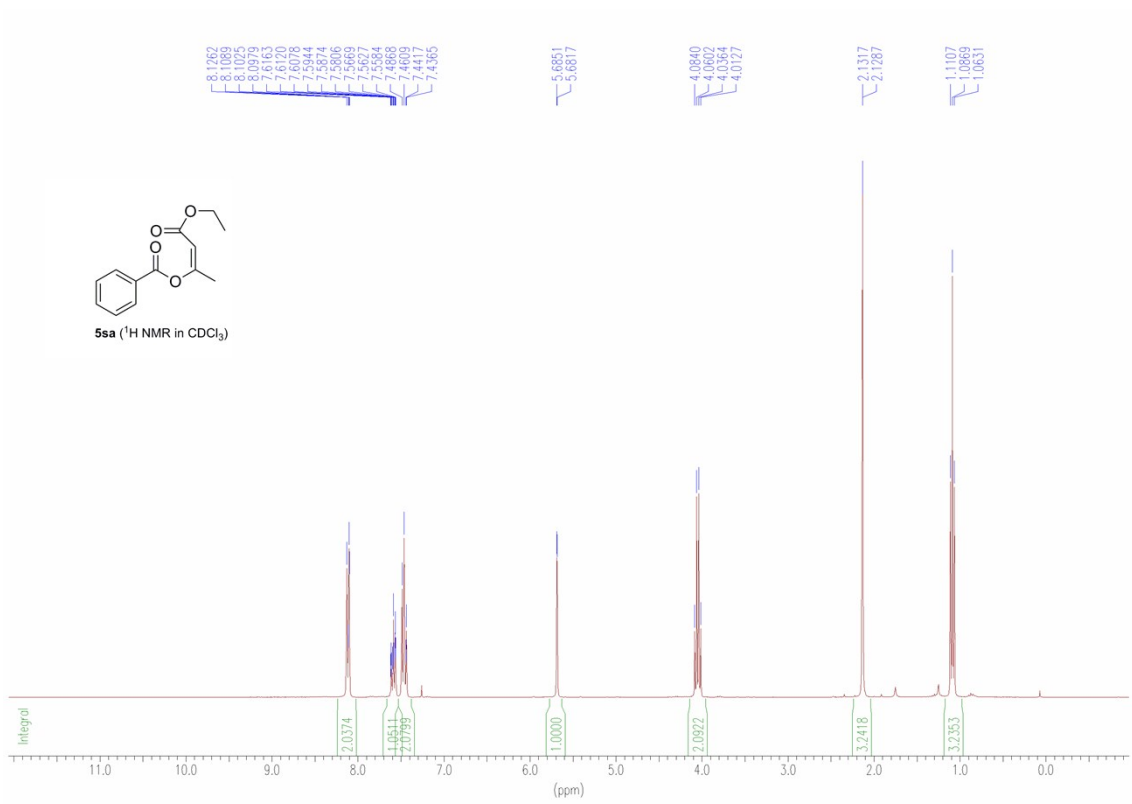

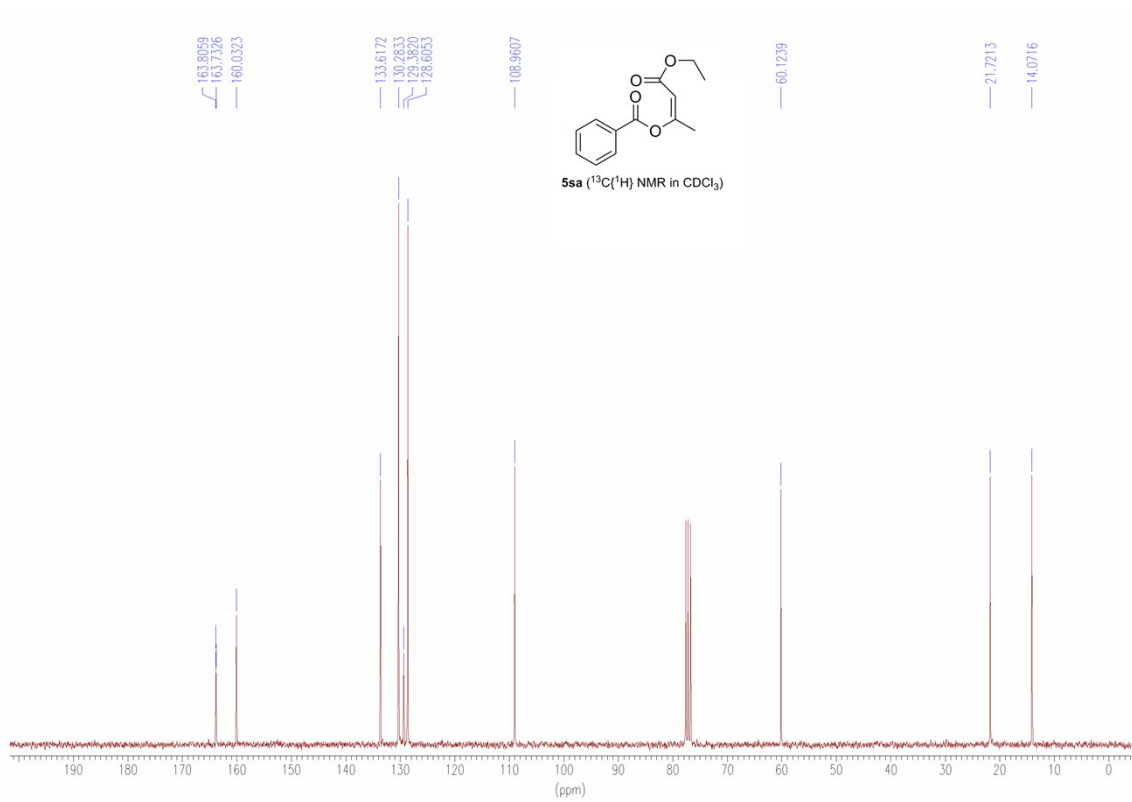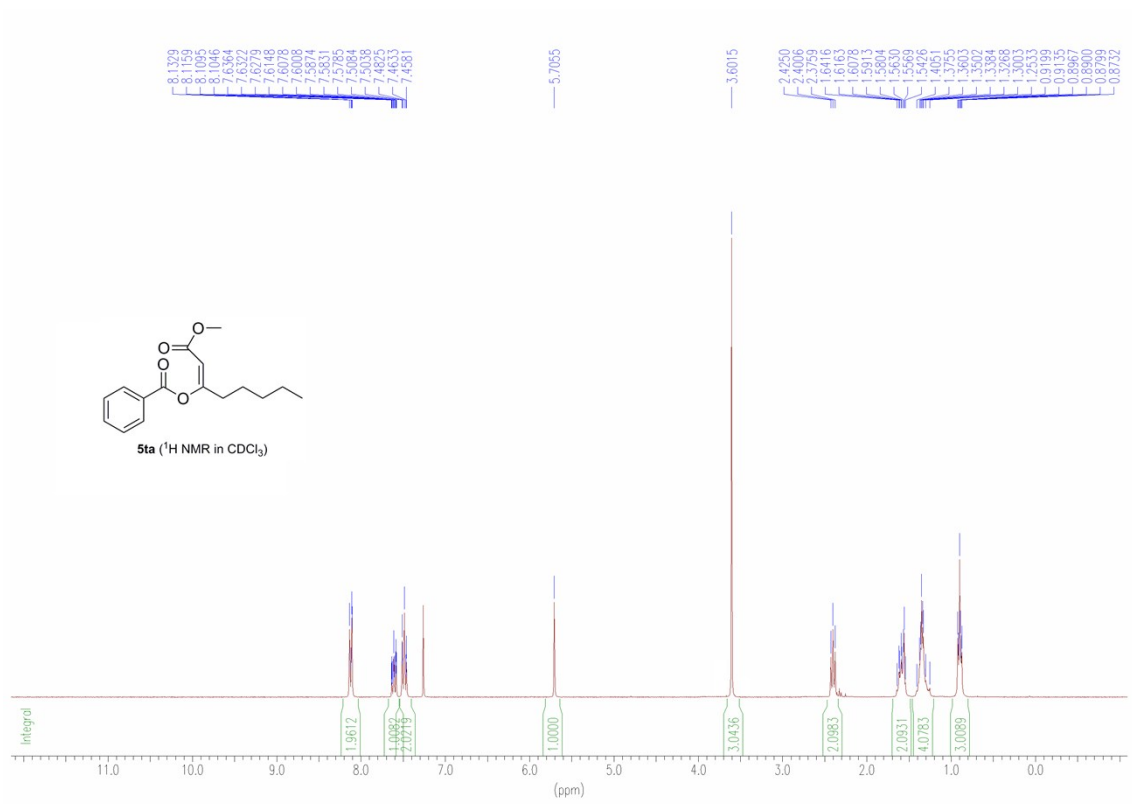

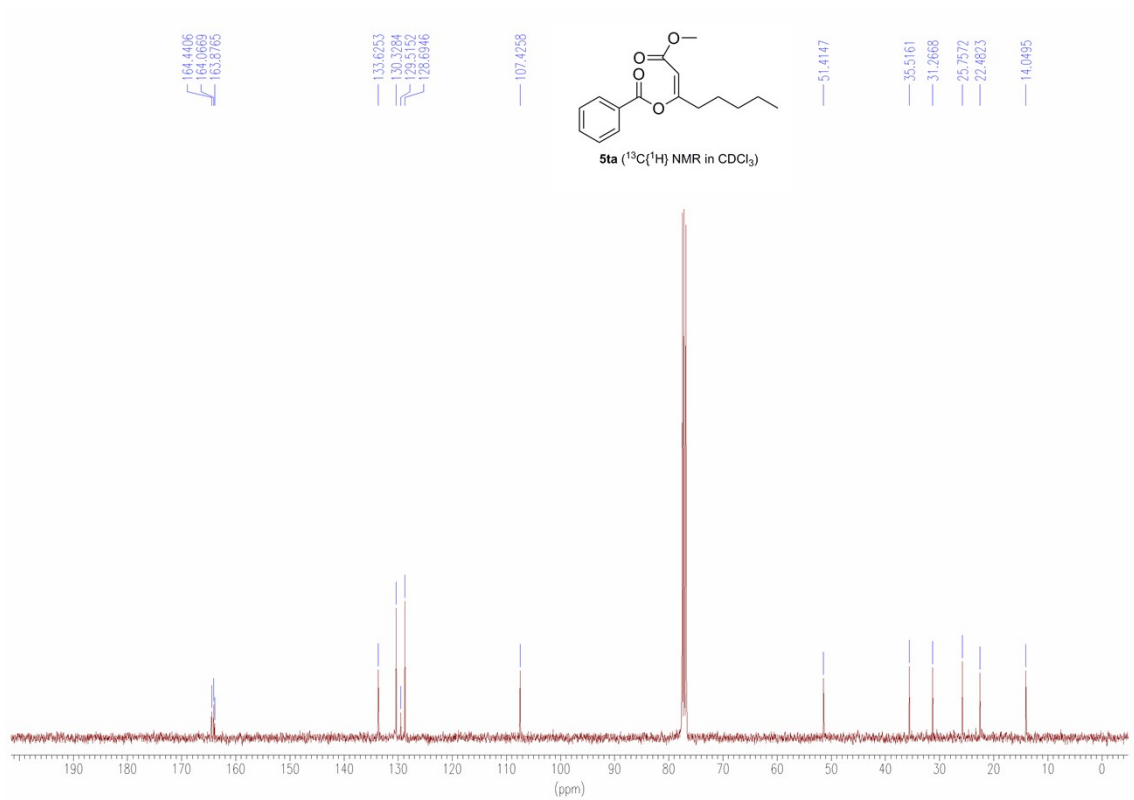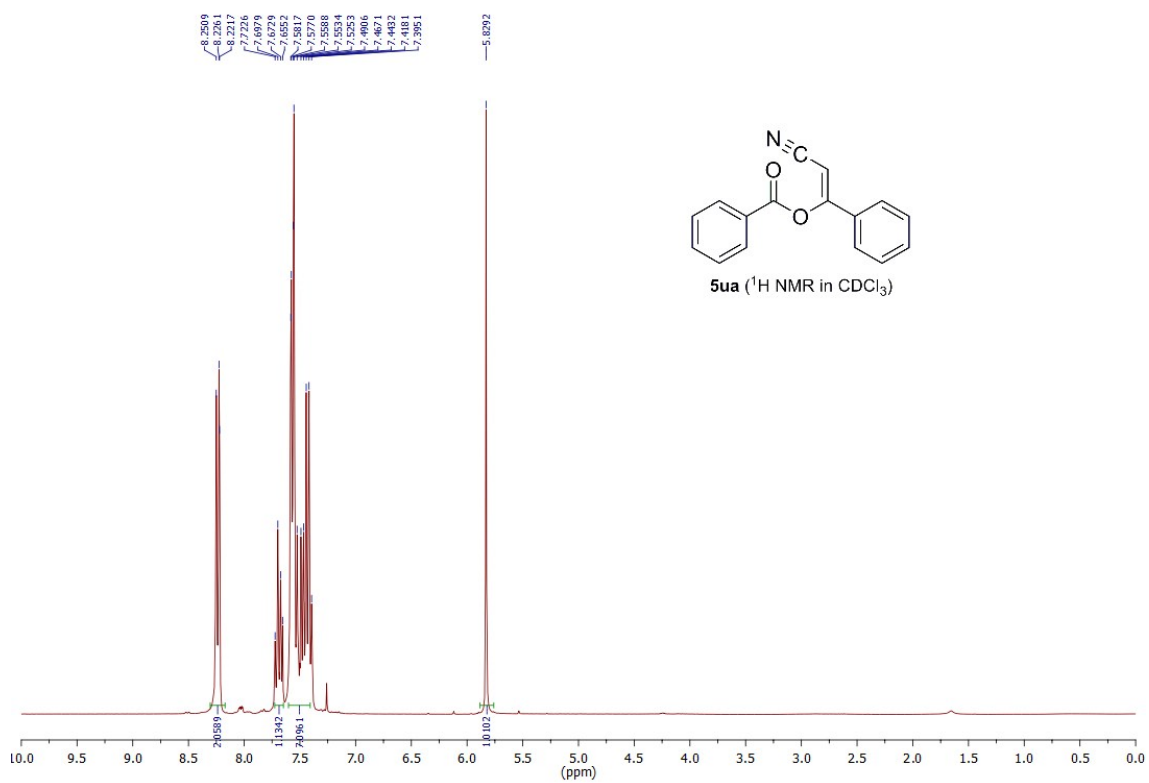

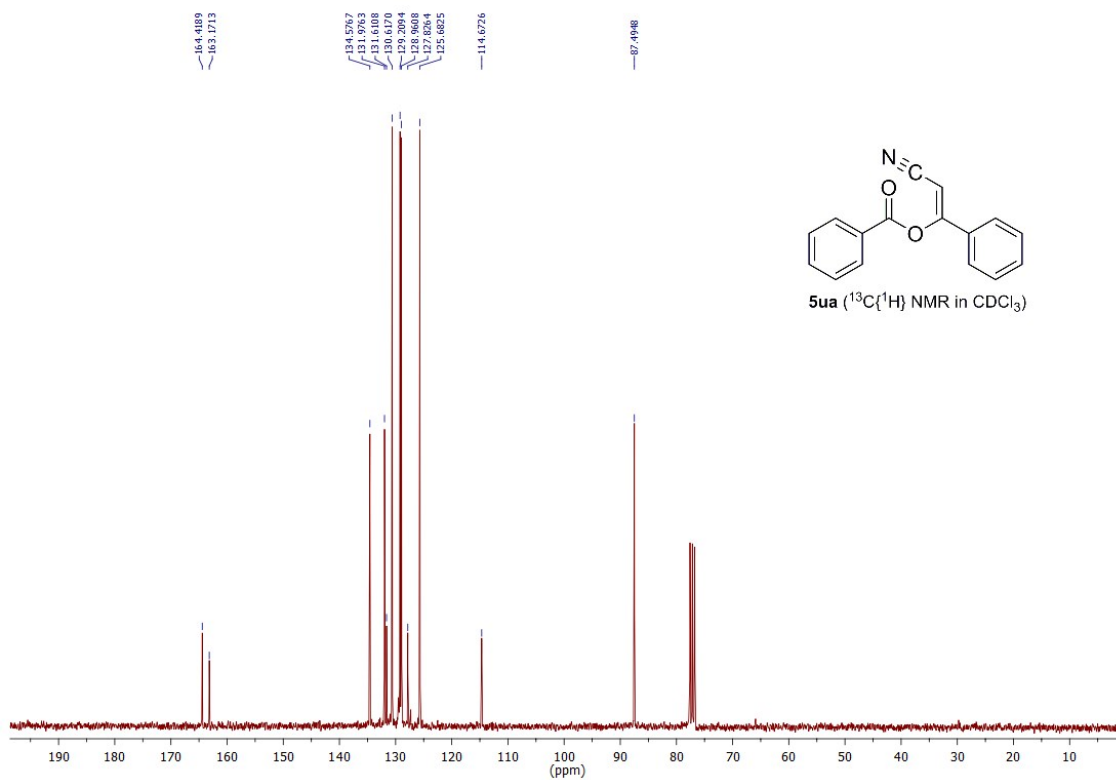

Supplement: c6ob02800d1.pdf [file c6ob02800d1.pdf]
